1 **Ebola virus inclusion body formation and RNA synthesis are controlled by a novel domain**  
2 **of NP interacting with VP35**

3

4 Tsuyoshi Miyake,<sup>a</sup> Charlotte M. Farley,<sup>a</sup> Benjamin E. Neubauer,<sup>a</sup> Thomas P. Beddow,<sup>a</sup> Thomas  
5 Hoenen,<sup>b</sup> and Daniel A. Engel,<sup>a#</sup>

6 <sup>a</sup>Department of Microbiology, Immunology and Cancer Biology, University of Virginia School  
7 of Medicine, Charlottesville, VA, USA

8 <sup>b</sup>Institute of Molecular Virology and Cell Biology, Friedrich-Loeffler-Institut, Greifswald -  
9 Insel Riems, Germany

10

11

12

13

14

15

16

17

18

19 Running Head: NP central domain controls EBOV inclusion bodies

20 # Address correspondence to Daniel A. Engel, [dae2s@virginia.edu](mailto:dae2s@virginia.edu)

21 Abstract word count: 249

22 Text word count: 5989

23 **Abstract**

24 Ebola virus (EBOV) inclusion bodies (IBs) are cytoplasmic sites of nucleocapsid formation and  
25 RNA replication, housing key steps in the virus life cycle that warrant further investigation.  
26 During infection IBs display dynamic properties regarding their size and location. Also, the  
27 contents of IBs must transition prior to further viral maturation, assembly and release, implying  
28 additional steps in IB function. Interestingly, expression of the viral nucleoprotein (NP) alone is  
29 sufficient for generation of IBs, indicating that it plays an important role in IB formation during  
30 infection. In addition to NP, other components of the nucleocapsid localize to IBs, including  
31 VP35, VP24, VP30 and the RNA polymerase L. Previously we defined and solved the crystal  
32 structure of the C-terminal domain of NP (NP-Ct), but its role in virus replication remained  
33 unclear. Here we show that NP-Ct is absolutely required for IB formation when NP is expressed  
34 alone. Interestingly, we find that NP-Ct is also required for production of infectious virus-like  
35 particles and retention of viral RNA within these particles. Furthermore, co-expression of the  
36 nucleocapsid component VP35 overcomes deletion of NP-Ct in triggering IB formation,  
37 demonstrating a functional interaction between the two proteins. Of all the EBOV proteins only  
38 VP35 is able to overcome the defect in IB formation caused by deletion of NP-Ct. This effect is  
39 mediated by a novel protein-protein interaction between VP35 and NP that controls both  
40 regulation of IB formation and RNA replication itself, and which is mediated by a newly  
41 identified domain of NP, the “central domain” (CD).

42

43 **Importance**

44 Inclusion bodies (IBs) are cytoplasmic sites of RNA synthesis for a variety of negative sense  
45 RNA viruses including Ebola virus. In addition to housing important steps in the viral life cycle,

46 IBs protect new viral RNA from innate immune attack and contain specific host proteins whose  
47 function is under study. A key viral factor in Ebola virus IB formation is the nucleoprotein, NP,  
48 which also is important in RNA encapsidation and synthesis. In this study, we have identified  
49 two domains of NP that control inclusion body formation. One of these, the central domain  
50 (CD), interacts with viral protein VP35 to control both inclusion body formation and RNA  
51 synthesis. The other is the NP C-terminal domain (NP-Ct), whose function has not previously  
52 been reported. These findings contribute to a model in which NP and its interactions with VP35  
53 link the establishment of IBs to the synthesis of viral RNA.

54

## 55 **Introduction**

56 Ebola virus (EBOV) causes severe, often fatal hemorrhagic disease in humans and is currently  
57 receiving enhanced attention due to a large recent outbreak in the Democratic Republic of Congo  
58 during late 2018 to early 2020. Promising vaccination development is underway, but efforts to  
59 better understand EBOV virology and pathogenesis so that additional approaches to prophylaxis  
60 and therapeutic discovery can be developed are still required (1-4).

61 Along with EBOV and the related Marburg virus (MARV), several well characterized  
62 negative strand RNA viruses, including vesicular stomatitis virus (VSV), respiratory syncytial  
63 virus (RSV), rabies virus (RABV), human parainfluenza virus (HPIV), Nipah virus (NiV), and  
64 human metapneumovirus (hMPV) carry out key replication steps in specialized cytoplasmic  
65 compartments referred to as inclusions, inclusion bodies (IBs) or Negri bodies (in the case of  
66 RABV) (5-19). In general, IBs are complex sites of viral RNA synthesis and contain viral  
67 proteins required for this process. In addition, IBs co-localize with specific host proteins whose  
68 roles in formation, maintenance and/or function of IBs are under study (19-25). Typically IBs

69 lack an organizing outer membrane and in some cases their formation is driven by liquid phase  
70 separation, a physical consequence of specific viral protein properties (26, 27). Evidence from  
71 RABV, RSV and EBOV suggests a dynamic relationship between IBs and virus-induced stress  
72 granules or specific stress granule proteins, and that this relationship regulates the innate immune  
73 response to infection (20, 23, 28). IBs are also thought to present a physical barrier to protect  
74 their RNA contents from innate immune attack. Precisely how IBs come into existence, the  
75 exact molecular processes they support during RNA synthesis, how they interfere with innate  
76 immunity and how they pass their contents along for further viral maturation are all incompletely  
77 answered questions that have garnered recent scrutiny.

78         IBs within EBOV infected cells are initially small and located near the endoplasmic  
79 reticulum, but become more widespread as infection progresses, and many increase in size (17,  
80 29, 30). They contain viral proteins NP, VP35, VP40, VP30, VP24 and L, which are involved in  
81 various aspects of positive and negative sense RNA synthesis, nucleocapsid assembly and  
82 function, and viral maturation (30-32). Indeed, intact viral nucleocapsids have been visualized  
83 within EBOV IBs (18, 29, 33). The nucleoproteins (NP) of EBOV and MARV are key players  
84 in initiating IB formation, and cells ectopically expressing NP as the only viral factor contain  
85 “NP-induced IBs”, demonstrating that NP is sufficient for IB formation (10, 29, 34-37). In  
86 contrast, other viral nucleocapsid proteins fail to exhibit this behavior when individually  
87 expressed (34, 35, 38, 39), although there are somewhat conflicting data regarding the L  
88 polymerase in this regard. NP is a multifunctional 739 aa protein that is the most abundant  
89 component of the viral nucleocapsid, and in addition to triggering IB formation, its roles include  
90 RNA packaging, acting as a co-factor for RNA synthesis carried out by the viral polymerase L,  
91 and nucleocapsid assembly (32). A second viral protein, VP35, is also a required co-factor for

92 EBOV and MARV RNA synthesis and is important in nucleocapsid function and assembly (40,  
93 41). VP35 associates with NP and L, is found in IBs when co-expressed with NP, and one of its  
94 functions is to act as a bridge between NP and L in the formation of productive replication  
95 complexes (34, 35, 42). Physical interactions between VP35 and NP have been observed that  
96 involve both the N-terminal and C-terminal regions of NP (34, 41, 43-46), and these have been  
97 directly implicated in supporting viral RNA synthesis. Recently VP35 was shown to possess  
98 NTPase and helicase-like activities, which are proposed to support RNA remodeling during  
99 synthesis (47). VP35 also has well-documented anti-interferon (IFN) activity (48, 49).

100       Previously we reported the crystal structure of the C-terminal domain of NP (NP-Ct)  
101 from EBOV and the corresponding proteins from Tai Forest virus (TAFV) and Bundibugyo virus  
102 (BDBV) (50-52). NP-Ct is highly conserved across filoviruses and assumes a novel tertiary fold  
103 structure (50-53). Whereas activities carried out by the N-terminal domain of NP (aa 1-412; see  
104 Figure 1 and legend) have been well characterized and include RNA binding, NP-  
105 oligomerization, and physical association with VP35 and L, the activities of NP-Ct have  
106 remained a mystery. In this report, we demonstrate two novel and redundant functions of NP  
107 that control IB formation. One of these is carried out by NP-Ct, which we observe also plays a  
108 separate novel role in production of infectious transcription and replication-competent virus-like  
109 particles (trVLPs). The other IB-controlling function of NP is located within a previously  
110 uncharacterized region of the protein that spans amino acid positions 481-500, and is responsible  
111 for binding to the interferon inhibitory domain (IID) of VP35. Importantly, we find this region  
112 of NP (the “central domain”; CD) to be crucially important not only for IB formation, but also  
113 for viral RNA synthesis. Together these findings reveal new activities for NP in several key

114 viral replication steps and add to the complexity of viral RNA synthesis and IB dynamics that  
115 may potentially be exploited for small molecule inhibitor discovery.

116

## 117 **Results**

118

### 119 **NP-Ct is required for production of infectious VLPs but not for transcription or RNA** 120 **replication**

121 As illustrated in Figure 1A, NP-Ct spans amino acids 641-739, which corresponds to a region of  
122 high sequence conservation among *ebolavirus* species (51). To investigate its function, a series  
123 of deletion mutants were tested in the trVLP assay (54-56). In this assay, viral proteins VP40,  
124 VP24 and GP are expressed from a tetracistronic minigenome (MG), which also expresses  
125 Renilla luciferase as a reporter. All other viral proteins (NP, VP35, VP30 and L) are supplied  
126 individually by transfection. The transfected “p0” cells are competent for transcription, RNA  
127 replication and production of infectious VLPs containing newly replicated and encapsidated  
128 MGs. trVLPs can be recovered from the p0 supernatant and used to infect “p1” cells, which will  
129 produce new MGs and trVLPs if they also are supplied by transfection with plasmids encoding  
130 NP, VP35, VP30 and L. Importantly, we expressed NP deletion mutants in p0 cells but provided  
131 wild-type NP in p1 cells, allowing determination of whether p0 cells produced infectious trVLPs  
132 whose replication could be supported in p1 cells. Also, in p0 cells the pCAGGS-NP expression  
133 plasmid was replaced with a pCAGGS-NP-FLAG construct (and mutant derivatives), which we  
134 found to support trVLP activity equally to untagged NP (Figure 1B). Full length and all mutant  
135 NP proteins were expressed at very similar levels as shown in Figure 1C.

136 Deletion of the C-terminal 139 amino acid residues in NP(1-600) reduced reporter  
137 activity down to ~28% of the full length protein in p0 cells, which is consistent with previous  
138 results (36) and is due to loss of a VP30 binding site (aa 600-615/617) that controls RNA  
139 synthesis, as described (57, 58). Mutant NP(1-550) or mutants with larger C-terminal deletions  
140 had less than 2% of wild-type reporter activity in p0 cells, with no statistically significant  
141 difference from a control lacking NP altogether, indicating a severe defect in transcription and/or  
142 RNA replication. In contrast, precise deletion of NP-Ct in NP(1-641) had no deleterious effect  
143 on reporter gene expression in p0 cells, indicating that NP(1-641) fully supports transcription and  
144 RNA replication. Strikingly however, when p0 cell supernatants from cells expressing NP(1-  
145 641) were used to infect p1 cells, reporter activity was only 1.0% of the wild-type, even though  
146 the p1 cells expressed wild-type NP supplied by transfection. These data demonstrate that  
147 despite wild-type levels of transcription and replication in p0 cells expressing NP(1-641), the p0  
148 supernatants contained virtually no infectious trVLPs. To understand this infectivity defect,  
149 trVLPs were isolated from p0 supernatants and analyzed for protein and negative strand viral  
150 RNA content using our previously published methods (56). Interestingly, trVLPs isolated from  
151 p0 cells expressing either wild-type NP or NP(1-641) contained equal amounts of NP, indicating  
152 that the NP-Ct deletion did not result in a defect in NP incorporation into trVLPs. Furthermore,  
153 these trVLPs also contained wild-type levels of VP35, GP and VP40, demonstrating that they  
154 were indeed assembled trVLPs (Figure 1D lanes 1 and 2). However, expression of NP(1-600) or  
155 (NP1-550) did not produce intact trVLPs (Figure 1D lanes 3 and 4), consistent with the fact that  
156 the p0 cells expressing these proteins also did not express GP or VP40 (Figure 1D lanes 7 and 8),  
157 nor did they efficiently produce infectious VLPs as shown in Figure 1B. Importantly, trVLPs  
158 containing NP(1-641) contained significantly decreased amounts (10%) of genomic RNA

159 compared with wild-type VLPs, which clearly correlates with their infectivity defect (Figures 1E  
160 and 1F). This indicates that NP-Ct has an important role in genomic RNA incorporation or  
161 stability within the trVLP's nucleocapsid, and as such supports our conclusion of a novel  
162 function for this domain.

163

### 164 **NP-Ct is required for formation of inclusion bodies**

165 As previously reported, NP from EBOV or MARV forms NP-induced IBs even in the absence of  
166 other viral proteins or viral RNA (10, 17, 29, 30, 34). To determine the role of NP-Ct in this  
167 process, HuH-7 cells were transfected with various NP-FLAG deletion constructs (Figure 2A)  
168 and stained with an anti-FLAG antibody (Figure 2B). Full length NP localized in IBs as  
169 expected, but NP(1-641), precisely lacking NP-Ct, clearly distributed throughout the cytoplasm  
170 and no IBs were observed. Also all other C-terminal deletion mutants of NP lacking NP-Ct,  
171 namely 1-600, 1-550, 1-500, 1-481 and 1-450, didn't localize in IBs (Figure 2B). Expression of  
172 NP-Ct by itself as NP(640-739) was not sufficient for IB formation, and also NP(410-739) did  
173 not localize to IBs, indicating that additional N-terminal domains are also required. Deletion of  
174 the N-terminal aa 1-24 region, part of which is required for NP oligomerization and virus  
175 replication (43, 44) had no effect on IB formation, indicating that this region is dispensable for  
176 triggering IB formation. Together these results demonstrate that NP-Ct is an essential element for  
177 NP-induced IB formation.

178

### 179 **VP35 specifically complements deletion of NP-Ct**



180 We wondered if the role of NP-Ct in IB formation might be linked to its requirement for  
181 production of infectious VLPs as presented in Figure 1. Accordingly, we examined the  
182 localization of mutant NP(1-641) in the context of cells expressing all other trVLP assay  
183 components. Under these conditions NP(1-641) clearly localized in IBs (Figure 3A 2nd row), in  
184 complete contrast to its behavior when expressed alone (Figure 2). This indicated that one or  
185 more components of the trVLP system could complement the mislocalization of NP(1-641).  
186 Next, we systematically omitted each of the trVLP expression plasmids to identify which  
187 plasmid is necessary for complementing mislocalization of NP(1-641). As shown in Figure 3A,  
188 only omission of the VP35 expression plasmid, but not of any other trVLP system component,  
189 resulted in mislocalization of NP(1-641). To confirm that VP35 is indeed necessary and  
190 sufficient to complement the NP-Ct deletion, each plasmid of the trVLP system was transfected  
191 individually along with NP(1-641), as shown in Figure 3B. The VP35 expression plasmid was  
192 the only one that complemented mislocalization of NP(1-641).

193 To avoid the potential problem of individual transfected cells receiving less than the full  
194 complement of plasmids, we used a lipid-based transfection with transfection complexes  
195 containing numerous plasmid copies. Given that the molecular weight of the transfected  
196 plasmids was between 3.5 and  $7 \times 10^6$  g/mol, and that there were  $\sim 1 \times 10^6$  cells per well at the  
197 time of transfection, this means that for each cell there were  $>10,000$  plasmid copies available  
198 for transfection even of the lowest amounts (i.e. 75 ng). Thus, if a cell took up a transfection  
199 complex, it was very unlikely that plasmids of a single type would be absent from the complex.  
200 More importantly, our data clearly show that when we omitted the VP35 plasmid, we observed a  
201 dramatic change in phenotype, which we did not observe in any of the other cases (Figure 3). To  
202 confirm the data in Figure 3 indeed represent the typical phenotype of transfected cells, we

203 counted 200+ cells per sample for each biological replicate, comparing NP in the inclusion  
204 bodies with overall NP-positive cells. In every case except the sample omitting the VP35  
205 plasmid, the IB phenotype was >90%, of stained cells, and in the sample omitting VP35, it was  
206 0%. These results demonstrate that VP35 is necessary and sufficient for NP(1-641) localization  
207 to IBs. VP35 is a co-factor for EBOV RNA synthesis and also has anti-interferon (IFN) activity  
208 (31). Since VP35 fails to trigger IB formation on its own (10, 34), these data also demonstrate  
209 that in the context of NP(1-641) expression, only two proteins, NP and VP35, are sufficient for  
210 IB formation. The data also show that mislocalization of NP(1-641) was likely not the cause of  
211 failure to produce infectious VLPs in p0 supernatants (Figure 1), because in cells that included  
212 NP(1-641) and all other trVLP components including VP35, intact IBs were observed, with  
213 proper NP(1-641) localization. This strongly suggests the presence of dual, separate functions in  
214 NP-Ct, one involved in infectious VLP production and the other controlling IB formation.

215

### 216 **The 481-500 region of NP is required for IB formation and for association with VP35**

217 Because NP(1-641) localized in IBs when co-expressed with VP35, additional constructs were  
218 created to test which NP region is specifically required for IB formation in the presence of VP35,  
219 as presented in Figure 4A. FLAG-tagged C-terminal deletion mutants of NP were co-transfected  
220 with VP35. Full length NP(1-739) as well as all C-terminal deletion mutants up to NP(1-500)  
221 co-localized efficiently with VP35 in IBs, but neither NP(1-481) nor NP(1-450) did so. This  
222 indicates that the NP 481-500 region is required for IB localization when co-expressed with  
223 VP35, and explains the complementing activity of VP35 toward NP(1-641). However, as shown  
224 in Figure 1B, deletion mutants 1-550 or further C-terminal deletions showed trVLP activity of  
225 less than 1%, and the same was true for an additional mutant, NP(1-481)flag (data not shown).

226 Therefore, the NP-VP35 interaction is not sufficient to support replication and transcription in  
227 the EBOV trVLP assay.

228 Next, physical interactions between myc-tagged NP and FLAG-tagged VP35 were  
229 examined. As shown in Figure 4B, full length NP, NP(1-641) and NP(1-500) co-  
230 immunoprecipitated with VP35, but NP(1-481) and NP(1-450) did not. Identical results were  
231 observed using VP35-myc and NP-FLAG constructs (i.e. reversed epitope tags), using  
232 immunoprecipitation with anti-myc antibody (data not shown). Thus, our results with co-  
233 immunoprecipitation of NP deletion mutants and VP35 were completely aligned with IB co-  
234 localization of the identical NP deletion mutants and VP35 (Figure 4A). We conclude that the  
235 NP 481-500 region is important for both VP35 association and for IB formation.

236

### 237 **A highly conserved acidic/hydrophobic patch in NP region 481-494 interacts with VP35**

238 Based on our deletion analysis we noticed that the 481-500 region contains a highly conserved  
239 acidic/hydrophobic patch, specifically focused within aa 481-494. Sequence conservation is  
240 observed across five *ebolavirus* members including EBOV, whose sequence in this region  
241 consists solely of acidic and hydrophobic residues (Figure 5A). To examine the importance of  
242 this region, three alanine-scanning mutants were constructed to interrogate the possibly  
243 redundant activities of the constituent residues. As such, each mutation converted 4 or 5  
244 consecutive residues to alanine stretches (Figure 5A). Initially the mutants were tested in the  
245 context of full-length NP expressed alone, but none of them, namely A(482-5), A(485-8) or  
246 A(489-93) had any effect on IB formation (Figure 5B). We interpret this result to be due to the  
247 presence of an intact NP-Ct in the full-length protein, which provided the redundant IB-  
248 formation function. We also tested the localization of NP(1-641) or NP(1-500) with our three

249 alanine scanning mutants. As expected, due to the lack of NP-Ct, these mutants distributed in  
250 the cytosol and no IB localization was observed (data not shown). Next, we tested whether the  
251 same mutations affect IB formation by NP(1-739), NP(1-641) or NP(1-500) in the presence of  
252 VP35. As shown in Figure 5C, all NPs retaining wild-type sequences within the 481-494 region  
253 co-localized with VP35 in IBs (top panel). Also, full length NP(1-739) containing alanine  
254 scanning mutations localized to IBs, as expected due to the presence of NP-Ct. Importantly  
255 however, VP35 overwhelmingly distributed to the cytosol in the presence of NPs containing any  
256 of the alanine scanning mutants. There was some minor co-localization of VP35 and NPs with  
257 the A(482-5) or A(489-93) mutations, but even in those cases most VP35 clearly spread widely  
258 in the cytosol, and not in IBs. This indicates that the NP 481-494 region is required for  
259 localization of VP35 in NP-induced IBs. In the case of alanine scanning mutations within NP(1-  
260 641) and NP(1-500), both of which lack NP-Ct, no IB co-localization with VP35 was observed.  
261 These data clearly suggest physical interaction between the NP 481-494 region and VP35, and  
262 that this interaction can establish localization at IBs through VP35-NP complex formation.

263 To further test this hypothesis, we performed co-immunoprecipitation assays of NP  
264 mutants within the 481-494 region (Figure 5D). In the full-length NP(1-739) context, VP35-myc  
265 associated with wild-type NP-FLAG, but did not pull down any of the three alanine scanning  
266 mutants. The identical result was obtained in the context of NP(1-500) containing each of the  
267 alanine scanning mutations. Thus, from co-localization and co-immunoprecipitation  
268 experiments, we conclude that the NP 481-500 region, particularly 481-494, is important for the  
269 interaction between NP and VP35.

270

271 **The IFN inhibitory domain of VP35 is required for NP-VP35 association and co-**  
272 **localization at IBs.**

273 Previously, the NPBP (NP binding peptide) of VP35 (aa 20-48) was shown to interact with the  
274 NP N-terminal domain (43, 44). NPBP binding is essential for RNA replication and  
275 transcription, and it inhibits NP oligomerization and also preserves NP in an RNA-free state (43,  
276 44). We tested whether mutation of the NPBP sequence affects the ability of VP35 to  
277 complement deletion of NP-Ct in the formation of IBs. However, mutation of crucial NPBP  
278 residues L33D and M34P (43) had no effect on IB formation (not shown). Further deletions of  
279 VP35 were constructed to explore the domain(s) responsible for complementing the NP-Ct  
280 deletion. As shown in Figure 6A, full length VP35(1-340) co-localized with NP(1-739), NP(1-  
281 641), and NP(1-500). Interestingly, VP35(1-219), lacking the interferon inhibitory domain (IID)  
282 located within aa 221-340, failed to co-localize with NP in IBs, or to complement NP-Ct deletion  
283 mutants NP(1-641) and NP(1-500). VP35(40-340), which lacks most of the NPBP sequence, did  
284 co-localize with all NPs in IBs (full length, NP(1-641) and NP(1-500)). Also VP35(80-340),  
285 which completely lacks the NPBP sequence, co-localized with all NPs and localized in IBs.

286 As expected, IBs were observed when full length NP(1-739) was co-expressed with  
287 VP35(215-340) containing the IID, and the two proteins co-localized. However, the same  
288 portion of VP35 didn't trigger IB formation when co-expressed with either NP(1-641) or NP(1-  
289 500) as shown in Figure 6A. This indicates that when NP-Ct is missing, VP35 IID is not  
290 sufficient to trigger IB formation, even though both NP(1-641) and NP(1-500) can interact with  
291 the IID. Therefore, VP35 sequences between aa 80 and 215 are also required for this function.

292 To test whether VP35 physically associates with the NP 481-500 region, NP(1-500) and  
293 its three alanine scanning mutants were tested for co-immunoprecipitation with VP35 and several

294 of its deletion mutants (Figure 6B). NP(1-500) co-immunoprecipitated with full length VP35 (as  
295 also shown in Figure 4B). Consistent with our co-localization data, VP35(1-219), completely  
296 lacking the IID, did not associate with NP(1-500). VP35(40-340) and VP35(80-340) did  
297 associate with NP(1-500), demonstrating that the NPBP sequence is dispensable for binding of  
298 NP(1-500) to VP35. Importantly, VP35(215-340), containing the IID, co-immunoprecipitated  
299 with NP(1-500), but not with NP(1-481), NP(1-500/482-5A), NP(1-500/485-8A), or NP(1-  
300 500/489-93A), demonstrating that the VP35 IID-NP interaction requires the NP 481-494 region.

301         Previously it was shown that the “first basic patch” of the VP35 IID (59), binds to NP and  
302 is critically important for RNA synthesis in a minigenome assay (45). To test whether these  
303 residues are involved in the interaction with NP (481-500), mutants (R225A and K248A), which  
304 abolished minigenome activity and binding to NP (45) were tested by pull-down assays (Figure  
305 6C). Two additional VP35 mutants in the “central basic patch” (R312A and R322A) were also  
306 tested. These mutants abolish dsRNA binding, reduce suppression of IFN- $\beta$  promoter activation,  
307 but do not affect minigenome activity or NP binding (60). NP(1-641) and NP(1-500), both  
308 containing the NP 481-500 region, were examined for binding to all four VP35 mutants.  
309 Importantly, mutants R225A and K248A abolished the binding, but mutants R312A and R322A  
310 maintained efficient binding. These data are consistent with those of Prins et al. (45) and in  
311 addition suggest that residues within the first basic patch of VP35 IID are required for binding to  
312 the NP 481-500 region.

313         To further confirm the interaction between the NP(481-500) region and VP35-IID, GST  
314 fusion proteins of NP(412-500) or its shorter derivatives were expressed in *E. coli* and purified,  
315 as was His-tagged VP35-IID (Figure 6D “Input” ). Next, purified proteins were combined and  
316 subjected to pull-down assay. As shown in Figure 6D, we clearly confirmed the association of

317 GST-NP with His-VP35-IID using constructs containing NP(412-500), NP(481-500) and  
318 NP(481-494). No binding was observed with either GST alone or with GST-NP(412-480). These  
319 data demonstrate that NP(481-494) is sufficient to bind to VP35 IID and identify it as a novel  
320 VP35-binding domain. Importantly, for the data presented in Figure 6D, purified proteins were  
321 used because this ensured that equivalent amounts of each domain could be strictly compared.  
322 To reduce nonspecific binding under these conditions, the protocol was optimized, including  
323 elevated salt concentration for higher stringency (see Materials and Methods). The highest salt  
324 concentration was 0.5M NaCl, which demonstrated that the binding was resistant to stringent  
325 conditions, including detergent. These conditions reduced the amount of recovered protein, but  
326 specificity of binding was nonetheless demonstrated.

327

### 328 **The NP 481-500 region is crucial for EBOV RNA synthesis**

329 Given the important role of the NP 481-500 region in IB formation and interaction with VP35,  
330 and considering the known functions of NP and VP35 in viral RNA synthesis (31), we asked if  
331 the NP 481-500 region is important for reporter activity in p0 cells, which is directly dependent  
332 on viral transcription and RNA replication (54-56). Accordingly, trVLP assays of our three  
333 alanine-scanning mutants and the corresponding wild-type constructs were performed. As  
334 shown in Figure 7, in the context of the full-length NP backbone, all three mutants resulted in  
335 strongly reduced reporter activity in p0 cells amounting to 4-12.5% of activity observed in  
336 context of wild-type NP. Of note, when p1 cells expressing alanine scanning mutant NPs were  
337 infected with wild-type trVLPs from p0 cells, reporter activity in the p1 cells was also strongly  
338 reduced, indicating that the mutants were defective in replication of incoming genomes  
339 associated with wild-type nucleocapsids (not shown). Keeping in mind that these mutant NPs

340 still localized in IBs due to the presence of NP-Ct (Figure 5B and C), we conclude that the NP-  
341 VP35 interaction mediated by the NP 481-500 region is by itself essential for full  
342 transcription/RNA replication activity of EBOV. Similar experiments were also performed  
343 within the context of the NP(1-641) backbone lacking NP-Ct. Under these conditions, activity of  
344 the three alanine scanning mutants was 2.3-2.5% of control NP(1-641) protein in p0 cells,  
345 whereas unmutated NP(1-641) fully supported reporter activity in p0 cells (as also shown in  
346 Figure 1). Considering that omission of NP altogether from the trVLP assay showed 2.4% the  
347 activity of the complete system (“no NP” in Figure 7), clearly these alanine-scanning mutants  
348 abolished almost all EBOV RNA synthesis. Taken together, we conclude that NP 481-500 is a  
349 crucial region for EBOV replication and importantly, and that its function represents a novel  
350 form of regulation at the interface of RNA synthesis and inclusion body dynamics.

351

## 352 **Discussion**

353 With this report we have characterized three novel functions of NP, two of which are carried out  
354 by NP-Ct, and a third controlled by the newly identified aa 481-500 central domain (CD). Based  
355 on our previous structural studies (50-52) we designed a deletion of NP-Ct that abolished  
356 production of infectious trVLPs in the trVLP assay, and also abolished IB formation when NP  
357 was expressed alone. In the trVLP assay, despite wild-type levels of transcription/replication  
358 that were achieved in p0 cells expressing mutant NP(1-641) (Figures 1 and 3A), these cells failed  
359 to produce infectious trVLPs. Importantly, since p1 cells in the trVLP assay were pre-loaded  
360 with wild-type NP, our results clearly demonstrate that the supernatants from p0 cells contained  
361 no infectious trVLPs whose replication would have been supported in p1 cells by the wild-type  
362 protein. Further analysis revealed that NP, VP35, VP40 and GP were all detected in similar



363 amounts when comparing trVLPs harvested from NP(1-739) or NP(1-641) expressing cells.  
364 Interestingly, even though the protein composition of the two trVLP types were the same, the  
365 amount of genomic RNA recovered from the NP(1-641)-associated trVLPs was only 10% of the  
366 wild-type (Figure 1E and F). These data clearly suggest that NP-Ct has an important role in  
367 genomic RNA incorporation or stability within the VLP nucleocapsids, and as such defines a  
368 novel function for this domain. Our finding that NP(1-641) has wild-type  
369 transcription/replication activity in p0 cells is consistent with it containing previously identified  
370 binding sites for VP35 and VP30 that support transcription/replication, as well as the novel  
371 binding site for VP35 described in this work (the CD), in addition to its other well-characterized  
372 N-terminal domain functions (aa 1-450) (29, 31, 32).

373         A second, apparently unrelated function of NP-Ct described here is in the control of IB  
374 formation. IB formation accompanies the establishment of viral RNA and nucleocapsid  
375 production in the context of viral infection, and also in the context of trVLP or minigenome  
376 replication. It is well-established that ectopic expression of NP by itself is sufficient for IB  
377 formation (10, 29, 34-37). Our data demonstrate that when NP is expressed alone, IB formation  
378 strictly depends on NP-Ct (Figure 2). However, expression of NP-Ct alone is not sufficient to  
379 trigger IB formation, suggesting that other regions of the protein are also specifically involved.  
380 Since mutant NP(410-739) also fails to make IBs (Figure 2) we conclude that sequences in the  
381 N-terminal domain are also required, possibly including the known RNA-binding and/or NP  
382 oligomerization functions, to trigger IB formation. Consistent with this, data from Noda et al.,  
383 using a series of ~150 aa deletions across NP, showed that only deletion of aa 451-600, which  
384 retained an intact NP-Nt and NP-Ct, allowed inclusion body localization (36). The mechanism  
385 by which NP-Ct contributes to IB formation is not yet known but may involve interactions with

386 cellular proteins in addition to viral protein interactions or structural regulation of NP. As  
387 proposed by Kolesnikova et al, NP helices can be observed by EM in the perinuclear region near  
388 ER-bound ribosomes, suggesting that these may be nucleation sites for spatially-directed early  
389 viral translation, and that this could explain the emergence of IBs in the perinuclear region (29).  
390 NP-Ct could conceivably be involved in this process.

391 We conclude that the two steps of virus replication supported by NP-Ct (infectious VLP  
392 production and IB formation) are mechanistically distinct, because in cells that expressed NP(1-  
393 641) plus all other trVLP components intact IBs and transcription/replication were observed  
394 (Figure 3), even though these cells failed to produce infectious trVLPs in p0 supernatants (Figure  
395 1). This indicates that failure of NP(1-641) to support infectious trVLP production did not  
396 impinge on the process of IB formation. It is interesting, but not necessarily surprising, that the  
397 two NP-Ct functions appear mechanistically distinct. The possible roles of NP-Ct in  
398 nucleocapsid assembly or overall viral assembly, leading to production of infectious particles,  
399 would be expected to involve, at least in part, NP as a stable component of the intact  
400 nucleocapsid within newly generating virions. This would likely be distinct from its role in IB  
401 formation, which seems to occur in coordination with newly forming or transcriptionally active  
402 nucleocapsids, particularly in light of our data presented here, demonstrating that IB formation  
403 and RNA synthesis are both controlled by the NP CD. Indeed, in their cryo-electron tomography  
404 studies of MARV and EBOV nucleocapsids from intact virus, Bharat et al. (2011) and Bharat et  
405 al. (2012) concluded that periodic outward facing protrusions of the nucleocapsid contain the C-  
406 terminal region of NP, in addition to VP24 and VP35 (61, 62), which is consistent with a  
407 structural role for the C-terminal region in building or stabilizing new virions. In these studies,  
408 the NP C-terminal region was more broadly defined than the focused NP-Ct characterized here,

409 but nonetheless NP-Ct might be expected to reside in the outward facing protrusions of the  
410 nucleocapsid and therefore be available to be involved in productive virus assembly, including  
411 possible contacts with VP40 to achieve proper assembly (36). Additionally, as we demonstrated  
412 in Figure 1, NP-Ct is required for viral genomic RNA to be found in isolated VLPs.

413         Importantly, we found that loss of NP-Ct in deletion NP(1-641) was efficiently  
414 complemented by VP35 expression in the formation of IBs, and this correlated with the physical  
415 association of NP(1-641) with VP35. Using a combination of deletion and alanine scanning  
416 mutations, we identified a novel region of NP (NP 481-500) that interacts with the interferon  
417 inhibitory domain (IID) of VP35 and is required for IB formation and RNA synthesis in the  
418 trVLP assay. We termed this region the NP central domain based on its location between NP-Nt  
419 and NP-Ct. We demonstrated that the VP35 IID is sufficient to bind to NP derivatives  
420 containing the CD, including a minimal GST-NP(481-494) fusion protein. The NP 481-494  
421 sequence is highly conserved among five ebolaviruses, and in EBOV it consists of only acidic  
422 and hydrophobic residues (Figure 5A). It was previously shown that VP35 IID binds to NP via  
423 basic patch residues in VP35, specifically involving R225, K248 and K251 of VP35, and that  
424 mutations in those residues abolished the interaction of VP35 IID with NP (45). In this study,  
425 we identified the region of NP responsible for VP35-IID binding. It is likely that the VP35 basic  
426 residues bind to the acidic residues in NP aa 481-494, because we observed that NP(1-500),  
427 which retains the CD, fails to bind VP35 derivatives with mutations in the first basic patch.  
428 Also, Prins et al. found that basic patch mutants R225A and K248A abolished an interaction  
429 between VP35 and NP (44), which is consistent with our data. Because inhibition of the VP35-  
430 CD interaction severely affects trVLP activity, inhibition of this interaction could be a good  
431 target for small molecule inhibition. Indeed, compounds that inhibit VP35-NP interactions have

432 been identified (63). Our study also raises the question of why there are apparently redundant  
433 functions encoded by EBOV to control IB formation, as revealed by complementation of the NP-  
434 Ct deletion by VP35 IID. Our finding clearly suggests that, even though VP35 supports IB  
435 formation in the absence of NP-Ct, fully functional IB formation likely requires both VP35 and  
436 NP-Ct. Tools are not currently available to distinguish among potentially different “stages” of  
437 IB function during infection, but these will be interesting to establish. IBs are turning out to be  
438 complex structures composed of viral and cellular components and we speculate that there are  
439 interesting, possibly distinct roles for both the NP-Ct and the VP35 binding domain of NP in this  
440 process, and that IBs may display different physical and functional properties as infection  
441 progresses.

442         Structural studies by Leung et al. and Kirchdoerfer et al. revealed the binding of a peptide  
443 derived from VP35 to the N-terminal domain of NP (43, 44). Binding of the VP35 peptide  
444 regulates NP-RNA interactions as well as NP oligomerization, both key requirements for  
445 productive RNA synthesis. Moreover the NP region targeted by the peptide, which crucially  
446 involves NP residues R240, K248, and D252, is required for maximal RNA synthesis in  
447 minigenome assays (44). These findings are the basis for models in which the binding of the  
448 VP35 peptide to the N-terminal domain of NP ensures a monomeric and RNA-free state of NP in  
449 preparation for productive replication of viral RNA (43, 44). To this picture we have added the  
450 dual roles of the NP CD in controlling both RNA synthesis and IB formation. Our data  
451 demonstrate that the CD is responsible for interacting directly with sequences within the IID of  
452 VP35 and is also crucially required for RNA synthesis and IB formation. Interestingly, this NP-  
453 VP35 interaction efficiently complements the defect in IB formation exhibited by the NP-Ct  
454 deletion mutant NP(1-641) when it is expressed alone (Figure 3). In our experiments, mutation

455 or deletion of residues within the NP-binding VP35 peptide responsible for controlling RNA  
456 binding and NP oligomerization (43, 44) had no effect on the ability of VP35 to complement  
457 deletion of NP-Ct or to localize to inclusion bodies (Figure 6 and accompanying text), clearly  
458 indicating that the two NP-binding functions of VP35 are separate. This raises interesting  
459 questions about the relationship between these two functions of VP35 in supporting RNA  
460 synthesis and nucleocapsid assembly. The fact that VP35 interacts directly with NP at two  
461 distinct sites could influence the affinity of the individual interactions or the avidity of the  
462 overall interaction. One interesting possibility is that the interaction of VP35 IID with the NP  
463 CD might prime or enhance the NPBP-NP interaction due to structural influences, thus allowing  
464 regulation of NP oligomerization and NP-RNA binding. Figure 8 illustrates the two binding  
465 sites within NP for VP35, as defined in this work and by others for the NPBP region of VP35  
466 (43, 44). In addition, Figure 8 illustrates the regions shown here involved in control of IB  
467 formation and production of infectious trVLPs. Further work will be required to understand these  
468 interesting relationships.

469         Some common themes have emerged from the study of inclusion bodies generated by  
470 pathogenic negative strand RNA viruses. These include the housing of RNA synthesis  
471 machinery, protection from innate immune mechanisms and association with certain host  
472 proteins (although there is not yet strong commonality among the different viruses regarding the  
473 identity of these proteins or their function in replication). In some cases there is good evidence  
474 that the structure of IBs is achieved by liquid phase separation (26, 27), which is mediated by the  
475 activity of specific viral proteins. For EBOV, NP has a central role in IB formation, but there is  
476 no evidence so far of a protein shell, phase separation or other process that distinguishes inside  
477 from outside. Rather, EM analysis indicates that IBs contain an accumulation of arrays of

478 growing or fully assembled nucleocapsids when cells are infected with live virus or transfected  
479 with various nucleocapsid components including NP (10, 42). Also, several groups have reported  
480 co-localization with cellular proteins, strongly suggesting that IBs are more than simply  
481 accumulations of nucleocapsids that serve as RNA synthesis factories (19, 20, 24). Regardless,  
482 whereas the molecular basis for IB formation remains a mystery overall, our results showing the  
483 involvement of NP-Ct and the NP CD support a model wherein the earliest steps of IB formation  
484 are controlled by NP and its interaction with VP35. However, despite the fact that a small  
485 domain of NP is sufficient for direct binding to VP35, and that this interaction controls both IB  
486 formation and RNA synthesis, we do not yet know if there is a cause-and-effect relationship  
487 between IB formation and RNA synthesis, or whether these two processes are concerted yet  
488 mechanistically independent. Clearly, RNA synthesis is not a prerequisite for IB formation.  
489 One striking example of this is when all components of the trVLP system are expressed in p0  
490 cells with the exception of the L polymerase, and this results in robust IB formation but no  
491 transcription/replication (Figures 1 and 3A). This situation also occurs when full length NPs  
492 containing CD mutations are included in the trVLP assay: again, IBs are formed yet  
493 transcription/replication is highly defective (Figures 5C and 7). In this case however, the IBs do  
494 not contain VP35 due to mutation of the CD (Figure 5C and 6B). These results are consistent  
495 with two models. In one model, IB formation and transcription/replication are independent  
496 processes, and both are dependent on the interaction between NP CD and VP35. In the second  
497 model, transcription/replication strictly depends on IB formation, which depends on VP35  
498 binding to NP. Further investigation of the molecular components of IBs (including the makeup  
499 of IBs at different stages of virus replication) will be required to fully distinguish among IB  
500 functional models.

501

502

## 503 **Materials and Methods**

504

### 505 **Plasmids**

506 All plasmids for the trVLP assay, i.e. pCAGGS-NP, pCAGGS-VP35, pCAGGS-VP30,

507 pCAGGS-L, p4cis-vRNA-RLuc, pCAGGS-T7, pCAGGS-Tim1, and pCAGGS-luc2, were

508 described previously (64). pCAGGS-NP-FLAG and pCAGGS-VP35myc were made from

509 pCAGGS-NP and pCAGGS-VP35 (55), respectively. All deletions and mutants of pCAGGS-

510 NP-FLAG and pCAGGS-VP35myc were made by using standard PCR and cloning methods.

511 Synthesized sequence of VP35 IID (aa 215-340) was cloned in pET45b (Novagen) to make His-

512 tagged VP35 IID. PCR amplified fragments of the NP(412-500) or shorter fragments from

513 pCAGGS-NP were cloned into pGEX-6P-2 (GE Healthcare). All sequences of the cloned or

514 mutated DNA regions of the plasmids were validated by Sanger DNA sequencing.

515

### 516 **Cells and transfection**

517 293T/17 cells and HuH-7 cells were grown in the media indicated in (65) and (54) respectively.

518 Both cell lines were transfected using TransiT-LT1 (Mirus) according to Biedenkopf et al. (54)

519 except reverse transfection was performed.

520

### 521 **Immunoprecipitation**

522 Forty to forty-eight hours after the transfection, 293T/17 cells were washed once with PBS and

523 lysed in lysis buffer A (50 mM Tris-HCl pH 7.8, 1% NP-40, 150 mM NaCl, 1 mM EDTA) with

524 Pierce Protease Inhibitor Mini Tablets, EDTA-free (Thermo Scientific). The lysates were  
525 cleared by centrifugation at 14,000 RPM for 10 min at 4°C. Protein concentration was measured  
526 by BCA protein assay kit (Thermo Scientific). Identical amounts of protein in lysates were  
527 subjected to immunoprecipitation. Myc-tagged proteins were immunoprecipitated using mouse  
528 anti-myc monoclonal antibody (Cell signaling) and rProtein A agarose (Genesee). Identical  
529 amounts of lysates were incubated with antibody overnight, then rProtein A agarose was added  
530 and incubated for 1 hr. Agarose beads were washed with lysis buffer A 4 times. Proteins bound  
531 to the beads were eluted with 2x Laemmli sample buffer. Equal volumes of eluents were  
532 subjected to SDS-PAGE.

533

#### 534 **Western blotting**

535 Samples were prepared 40-48 hours after transfection by lysing the cells in 60 mM Tris pH 6.8  
536 and 2% SDS. After harvesting the lysates, they were sonicated briefly, and measured for protein  
537 concentration. Identical amounts of protein samples were subjected to SDS-PAGE and  
538 transferred to Immobilon-FL membrane (Millipore). Immunoprecipitated samples were  
539 subjected to SDS-PAGE and transferred to Immobilon-FL membrane (Millipore). FLAG-tagged  
540 and myc-tagged proteins were detected with rabbit anti-DYKDDDDK (FLAG) monoclonal  
541 antibody and rabbit anti-myc monoclonal antibody (Cell signaling), respectively. For western  
542 blotting of trVLPs, the following antibodies were used: rabbit anti-NP antibody (Genetex),  
543 mouse monoclonal anti-VP35 (Kerafast), mouse monoclonal anti-GP, H3C8 (a gift from Dr.  
544 Judy White), and rabbit anti-VP40 (IBT Bioservices). GAPDH mouse monoclonal antibody  
545 (Millipore) was used for the loading control. Goat anti-rabbit antibody conjugated with



546 IRDye680RD and goat anti-mouse antibody conjugated with IRDye800CW were used as  
547 secondary antibodies. Odyssey CLx (Li-Cor) was used to scan the membranes.

548

### 549 **Immunofluorescence staining**

550 Expression plasmids of the proteins indicated in the figures were transfected into HuH-7 cells  
551 and plated on coverslips in 6-well plates. "All trVLP" is the combination of following; pCAGGS  
552 expression plasmids encoding NP-FLAG or NP(1-641)-FLAG (125 ng/well), VP35 (125  
553 ng/well), VP30 (75 ng/well), L (1000 ng/well), T7-polymerase (250 ng/well), and a p4cis-  
554 vRNA-RLuc plasmid (250 ng/well). Forty to Forty-eight hours after the transfection, cells were  
555 washed once with PBS and fixed with 4% formaldehyde in PBS. After permeabilization with  
556 0.1% triton X-100 (Sigma-Aldrich) in PBS, cells were blocked with 1x diluted Odyssey  
557 Blocking Buffer (PBS) (Li-Cor). Cells were stained with primary antibodies: anti-  
558 DYKDDDDK, anti-myc antibody (Cell signaling) and/or mouse anti-VP35 antibody (Kerafast),  
559 then stained with secondary antibodies: Alexa Fluor 488 goat anti-mouse IgG (H+L) and Alexa  
560 Fluor 594 goat anti-rabbit IgG (H+L). The nuclei were stained with Hoechst 33342 dye.  
561 Prolong Gold antifade reagent (Invitrogen) was used for mounting.

562

### 563 **trVLP assay**

564 trVLP assays were performed according to Hoenen et al. (55) except that reverse transfection  
565 was performed. pCAGGS-NP was replaced with pCAGGS-NP-FLAG or its derivatives in either  
566 p0 or p1 cells as indicated in the figures.

567

### 568 **Protein and RNA analyses of isolated trVLPs**

569 Procedures are described in Watt et al (56). with minor modifications. For western blotting of  
570 purified trVPLs, 24 ml of cell supernatant (72 hrs after transfection) was harvested and  
571 centrifuged twice at 2500 RPM for 10 min to remove cell debris, then concentrated by  
572 ultracentrifugation through a 20% sucrose cushion in an SW-32 rotor at 25,000 RPM for 2.5 hrs  
573 at 4°C. Pellets were resuspended in 140 µl of PBS and 47 µl of 4x sample buffer was added.  
574 Equivalent volumes of samples were subjected to western blot analysis. For RNA quantification,  
575 RNA was purified from 280 µl VLP-containing supernatant using a QIAamp viral RNA (vRNA)  
576 Mini Kit (Qiagen) according to the manufacturer's instructions. Sixteen µl of RNA was  
577 subjected to a 30-min DNase digest using 2 µl DNase I (Thermo Scientific) in a total volume of  
578 20 µl according to the manufacturer's instructions. Digested RNA (7.5 µl) was reverse  
579 transcribed using Super-Script III reverse transcriptase (Life Technologies) according to the  
580 manufacturer's instructions with the primer 5-CGGACACACAAAAAGAAAGAAG-3. Five µl  
581 of the resulting cDNA was amplified by touchdown PCR (10 cycles of annealing at 59 to 54°C  
582 for 30 s, followed by 10 cycles of annealing at 54°C for 30 s) using Taq polymerase (New  
583 England Biolabs) according to the manufacturer's instructions and the primers 5-  
584 CTTGACATCTCTGAGGCAAC-3 and 5-ATGCAGGGGCAAAGTCATTAG-3. One µl of  
585 PCR product was then subjected to standard PCR with Taq polymerase using the primers 5-  
586 CGAACCACATGATTGGACCAAG-3 and 5-CTTATCAGACCTCCGCATTAATC-3.  
587 Quantification standards were included in each PCR at the stage of the first amplification.  
588 Known amounts of minigenome DNA were amplified along with RT-PCR under the same  
589 conditions and quantified to establish the linear range of amplification. A linear range of  
590 amplification was verified from the standards for all trVLP samples. Intensity of bands after

591 agarose gel electrophoresis was measured using the Molecular Imager XRS system and  
592 quantified with Image Lab (Bio-Rad).

593

#### 594 **Pull down assay of *E.coli* expressed proteins**

595 His-tagged VP35 IID (VP35 aa 215-340) and GST-NP (aa 412-500) or shorter  
596 variants were expressed in the BL21 CodonPlus strain (Agilent Technologies). Cells were lysed  
597 in Buffer (0.15) (50 mM Tris-HCl pH 8.0, 0.2 mM EDTA, 150 mM NaCl, 5 mM imidazole, 20%  
598 glycerol) with Pierce Protease Inhibitor Mini Tablets, EDTA-free (Thermo Scientific) and 0.1  
599 mg/ml of lysozyme (Sigma-Aldrich) and then the suspension was sonicated. After centrifugation,  
600 supernatants were subjected to purification using either HIS-Select HF Nickel Affinity Gel  
601 (Sigma-Aldrich) or Glutathione Sepharose 4B (GE healthcare). Purification was confirmed by gel  
602 electrophoresis and Coomassie Brilliant Blue (CBB) staining. After dialysis with Slide-A-Lyzer  
603 MINI Dialysis Devices, 3.5K MWCO (Thermo Scientific), purified proteins were quantified by  
604 BCA protein assay kit (Thermo Scientific). Protein concentration was set to 1  $\mu$ M of His tagged  
605 proteins and to 2  $\mu$ M of GST-tagged proteins for HIS-Select HF Nickel Affinity Gel pull down,  
606 and was set to 1  $\mu$ M of GST tagged proteins and to 2  $\mu$ M of His-fusion proteins for Glutathione  
607 Sepharose 4B pull down. Purified proteins were mixed as indicated in the figure and rotated with  
608 either HIS-Select HF Nickel Affinity Gel (Sigma-Aldrich) or Glutathione Sepharose 4B (GE  
609 healthcare) overnight. Beads were washed twice with Buffer (0.15) with 0.1% NP-40, once with  
610 Buffer (0.35) and Buffer (0.5), those are identical to Buffer (0.15) with 0.1% NP-40 except  
611 including 0.35 M and 0.5 M NaCl, respectively. Samples washed once again with Buffer (0.15)  
612 containing 0.1% NP-40. Proteins on the beads were eluted with 2 x sample buffer. Identical  
613 volumes of the samples were subjected to SDS-PAGE, and stained with CBB.

614

615

616

617

618 **Figure legends**

619

620 **Figure 1. NP-Ct is required for infectious VLP production.**

621 A: NP primary structure. The precise definition of the N-terminal domain is subject to  
622 interpretation based on sequences included in constructs used for structural and biochemical  
623 studies (43, 44, 51, 66), but is labeled here as aa 1-412 based on sequence conservation. NP-Ct  
624 domain definition is based on Dziubanska et al. (51). B: trVLP assay (p0 cells) of NP deletion  
625 mutants. Indicated NP-FLAG constructs were transfected into 293T/17 cells. As described in  
626 the text, recipient p1 cells were supplied with wild-type NP. Data are averages of independent  
627 biological triplicates. Error bars represent the SD of the triplicates. Marks above the bar  
628 indicate: \*  $p < 0.05$ , \*\*  $p < 0.01$ , \*\*\*  $p < 0.001$  to the corresponding NP-flag samples based on  
629 Student's t-tests. Untagged NP (column 1) showed no statistically significant difference from the  
630 corresponding NP-flag samples. C: Western blot of lysates from p0 cell transfectants. Lysates  
631 were separated by SDS-PAGE, blotted and probed with anti-FLAG (red) or anti-GAPDH (green)  
632 antibody. D: Western blot analysis of purified trVLPs and corresponding lysate from p0  
633 transfectants. Indicated NP-FLAG constructs were transfected into 293T cells (p0) along with  
634 all other trVLP components. trVLPs were purified from the supernatant as described in  
635 Materials and Methods. trVLPs and corresponding cell lysates were analyzed by western blot  
636 with the indicated antibodies. Anti-GAPDH was used as loading control for the lysate samples

637 and as specificity control for the purified trVLPs. E: RT-PCR quantification of genomic  
638 (negative strand) RNA from the indicated, isolated trVLPs. Isolated RNA was subjected to RT-  
639 PCR and quantified using linear range amplification standards as described in Materials and  
640 Methods. Positive control indicates a PCR product of a minigenome DNA template. F:  
641 Quantitation of RT-PCR. PCR products were subjected to agarose gel electrophoresis and  
642 quantified with the Molecular Imager XRS system. Means and standard deviations of  
643 biologically triplicate experiments are shown. Asterisk \*\*\* indicates  $p < 0.001$  to the NP(1-739)  
644 sample, \*\* indicates  $p < 0.01$  between NP(1-641) and NP(1-600) or NP(1-550) based on Student's  
645 t-test.

646

647 **Figure 2. NP-Ct is required for IB formation.** A: Structure of NP deletion mutants. Each  
648 construct contains a C-terminal FLAG-tag. B: HuH-7 cells were transfected with the indicated  
649 constructs and stained with anti-FLAG antibody and Hoechst 33342 dye after 48 hours. All the  
650 constructs lacking the NP-Ct failed to localize in IBs.

651 **Figure 3. VP35 specifically complements deletion of NP-Ct.** A: FLAG-tagged NP(1-739) or  
652 NP(1-641) was transfected along with other trVLP components, i.e. expression plasmids for  
653 VP35, VP30, L, T7 polymerase, a tetracistronic minigenome (mg) expressing VP24, GP and  
654 VP40, and firefly luciferase, as indicated, and immuno-stained with anti-FLAG antibody.  
655 Individually omitted constructs are indicated in red. B: NP(1-641) was co-transfected with each  
656 of the indicated individual plasmids of the trVLP system.

657

658 **Figure 4. The NP 481-500 region is required for IB formation and association with VP35**

659 A: Localization of co-expressed NP deletion mutants with VP35 in transfected HuH-7 cells.  
660 VP35 was detected with anti-VP35 antibody (green) and NP-FLAG proteins were detected with  
661 anti-FLAG antibody (red). Nuclei were stained with Hoechst 33342 dye (blue). B: Deletion  
662 mutants of myc-tagged NP (NP-myc) and VP35-FLAG were co-expressed in 293T/17 cells and  
663 immunoprecipitated with anti-myc antibody. Immunoprecipitated proteins and lysate were  
664 subjected to SDS-polyacrylamide gel electrophoresis (PAGE), blotted and detected by anti-myc  
665 or anti-FLAG antibodies, as indicated. A GAPDH antibody was used for the loading control.

666

667 **Figure 5. Alanine scanning mutants covering the NP 482-493 region abolish IB formation,**  
668 **co-localization and interaction with VP35.** A: Sequence alignment of five *ebolavirus* species  
669 members and sequences of alanine scanning mutants within EBOV. Identical residues are shown  
670 with white letters on black background, and similar residues are shown with black letters on grey  
671 background. Alanine mutations are boxed. B: Immunofluorescence staining of wild-type and  
672 alanine scanning mutants of full-length NP. FLAG-tagged NP and mutants were stained with  
673 anti-FLAG antibody (red) and Hoechst 33342 dye (blue). C: NP(1-739), NP(1-641) and NP(1-  
674 500), or their corresponding alanine scanning mutants were co-expressed with VP35. Cells were  
675 stained with anti-FLAG antibody (NP; red) and VP35 was stained with anti-VP35 antibody  
676 (green). Nuclei were stained with Hoechst 33342 (blue). Merged green/red fields are shown. D:  
677 Immunoprecipitation of co-expressed VP35-myc and wild-type or alanine scanning mutants of  
678 FLAG-tagged NP(1-739) or NP(1-500). Cells were co-transfected with VP35-myc and NP-  
679 FLAG derivatives, lysed and processed for immunoprecipitation as described in Materials and  
680 Methods. A GAPDH antibody was used for the loading control. Top panel: immunoprecipitates  
681 were separated by SDS-PAGE, blotted and probed with the indicated antibodies. Bottom panel:

682 Crude lysates were separated by SDS-PAGE, blotted and probed with the indicated antibodies to  
683 determine protein expression levels.

684

685 **Figure 6. VP35 IID associates with the NP (481-500) region.** A: Localization of deletion  
686 mutants of VP35 and NP. Wild-type and deletion mutants of NP were co-transfected with VP35  
687 wild-type and deletion mutants in HuH-7 cells. 48 hours after transfection, cells were stained  
688 with anti-FLAG (NP, red) and anti-myc (VP35, green). Merged green/red fields are shown. B:  
689 NP(1-500) and related mutants as indicated were co-transfected with VP35-myc wild-type and  
690 deletion mutants in 293T/17 cells and cells were lysed 48-50 hours after transfection. An anti-  
691 myc antibody was used for immunoprecipitation and co-immunoprecipitated proteins were  
692 analyzed by western blotting. GAPDH is the loading control of the lysate. Top panel:  
693 immunoprecipitates were separated by SDS-PAGE, blotted and probed with the indicated  
694 antibodies. The left and right sides of the data shown were sourced from the same image, with  
695 several lanes deleted between lanes 5 and 6 of the figure. Bottom panel: Crude lysates were  
696 separated by SDS-PAGE, blotted and probed with the indicated antibodies to determine protein  
697 expression levels. C: NP(1-500) and NP(1-641) were co-transfected with VP35-myc wild-type  
698 or indicated mutants in 293T/17 cells and cells were lysed 48-50 hours after transfection. An  
699 anti-myc antibody was used for immunoprecipitation and co-immunoprecipitated proteins were  
700 analyzed by western blotting. Top panel: immunoprecipitates were separated by SDS-PAGE,  
701 blotted and probed with the indicated antibodies. Bottom panel: Crude lysates were separated by  
702 SDS-PAGE, blotted and probed with the indicated antibodies to determine protein expression  
703 levels. D: Pull down assay of *E.coli* expressed proteins. GST-NPs with the indicated regions of  
704 NP or His-tagged VP35-IID were expressed in *E.coli* and purified using glutathione Sepharose or

705 Ni-NTA agarose. Purified proteins were dialyzed, subjected to SDS-PAGE and stained with  
706 CBB (Input panel). Purified proteins were quantified and equal amounts of GST-NPs or GST  
707 were mixed with His-VP35-IID protein. After overnight incubation with the indicated beads  
708 followed by washing, protein bound to the beads was extracted with 2x sample buffer, and equal  
709 volumes of the eluents were subjected to SDS-PAGE and stained with CBB.

710

711 **Figure 7. trVLP assay of wildtype and alanine scanning mutants in aa 481-500.**

712 For p0 assays, NP(1-739) or NP(1-641) and their alanine scanning mutants, A(482-5), A(485-8)  
713 or A(489-93) were co-transfected with other components of the trVLP p0 assay, and luciferase  
714 activity of each lysate measured. Wildtype NP (1-739) activity was set at 100%. trVLP assays in  
715 the absence of NP (“No NP”) or L (“No L”) were used as negative controls. For p1 assays,  
716 recipient cells were transfected with the complete set of trVLP plasmids including wildtype NP,  
717 and supernatants from the indicated p0 assay were used for infection. Error bars represent the SD  
718 from three independent biological replicates. Asterisk \* indicates  $p < 0.05$ , and \*\*\* indicates  
719  $p < 0.001$  to the corresponding NP(1-739) wildtype based on the Student’s t-test.

720

721 **Figure 8. Identified NP functions.** Full-length NP and VP35 proteins are illustrated. NP-N  
722 and NP-Ct cover aa 1-412 and 641-739 respectively, as defined in (51). The central domain  
723 (CD) spans aa 481-500. Red boxes: Regions required for IB formation. The large region  
724 spanning aa 25-410 is based on data shown in Figure 2B. The requirement for NP-Ct applies to  
725 NP-induced IBs, and when VP35 is co-expressed, NP-Ct is not required, as described in the  
726 text. Likewise, when NP-N and NP-Ct are present, mutation of the CD does not abolish IB  
727 formation; therefore NP-Ct and CD complement each other. Green box: Region required for



728 production of infectious trVLPs and incorporation/retention of viral RNA in purified  
729 trVLPs. For NP and VP35, black regions indicate NPBP and its corresponding binding region  
730 within NP, and the VP35 first basic patch as defined in (45, 60), and its corresponding binding  
731 region, the CD. See references (43, 44) for definition of NP region bound by NPBP. See  
732 Discussion for possible functional relationships between the two regions of VP35 that interact  
733 with NP.

734

### 735 **Acknowledgements**

736 The work was supported by NIH grant 1R21AI130420 to DAE. We thank Elizabeth Nelson and  
737 Prof. Judy White for reagents and helpful discussions.

738

739

### 740 **Bibliography**

- 741 1. Coltart CE, Lindsey B, Ghinai I, Johnson AM, Heymann DL. 2017. The Ebola outbreak,  
742 2013-2016: old lessons for new epidemics. *Philos Trans R Soc Lond B Biol Sci* 372.
- 743 2. Ilunga Kalenga O, Moeti M, Sparrow A, Nguyen VK, Lucey D, Ghebreyesus TA. 2019.  
744 The Ongoing Ebola Epidemic in the Democratic Republic of Congo, 2018-2019. *N Engl J*  
745 *Med* doi:10.1056/NEJMs1904253.
- 746 3. Wong G, Mendoza EJ, Plummer FA, Gao GF, Kobinger GP, Qiu X. 2018. From bench to  
747 almost bedside: the long road to a licensed Ebola virus vaccine. *Expert Opin Biol Ther*  
748 18:159-173.
- 749 4. Green A. 2017. Ebola outbreak in the DR Congo. *Lancet* 389:2092.
- 750 5. Cifuentes-Munoz N, Brantje J, Slaughter KB, Dutch RE. 2017. Human  
751 Metapneumovirus Induces Formation of Inclusion Bodies for Efficient Genome  
752 Replication and Transcription. *J Virol* 91.

- 753 6. Zhang S, Chen L, Zhang G, Yan Q, Yang X, Ding B, Tang Q, Sun S, Hu Z, Chen M.  
754 2013. An amino acid of human parainfluenza virus type 3 nucleoprotein is critical for  
755 template function and cytoplasmic inclusion body formation. *J Virol* 87:12457-70.
- 756 7. Garcia J, Garcia-Barreno B, Vivo A, Melero JA. 1993. Cytoplasmic inclusions of  
757 respiratory syncytial virus-infected cells: formation of inclusion bodies in transfected cells  
758 that coexpress the nucleoprotein, the phosphoprotein, and the 22K protein. *Virology*  
759 195:243-7.
- 760 8. Rincheval V, Lelek M, Gault E, Bouillier C, Sitterlin D, Blouquit-Laye S, Galloux M,  
761 Zimmer C, Eleouet JF, Rameix-Welti MA. 2017. Functional organization of cytoplasmic  
762 inclusion bodies in cells infected by respiratory syncytial virus. *Nat Commun* 8:563.
- 763 9. Norrby E, Marusyk H, Orvell C. 1970. Morphogenesis of respiratory syncytial virus in a  
764 green monkey kidney cell line (Vero). *J Virol* 6:237-42.
- 765 10. Kolesnikova L, Muhlberger E, Ryabchikova E, Becker S. 2000. Ultrastructural  
766 organization of recombinant Marburg virus nucleoprotein: comparison with Marburg virus  
767 inclusions. *J Virol* 74:3899-904.
- 768 11. Geisbert TW, Jahrling PB. 1995. Differentiation of filoviruses by electron microscopy.  
769 *Virus Res* 39:129-50.
- 770 12. Heinrich BS, Cureton DK, Rahmeh AA, Whelan SP. 2010. Protein expression redirects  
771 vesicular stomatitis virus RNA synthesis to cytoplasmic inclusions. *PLoS Pathog*  
772 6:e1000958.
- 773 13. Derdowski A, Peters TR, Glover N, Qian R, Utley TJ, Burnett A, Williams JV, Spearman  
774 P, Crowe JE, Jr. 2008. Human metapneumovirus nucleoprotein and phosphoprotein  
775 interact and provide the minimal requirements for inclusion body formation. *J Gen Virol*  
776 89:2698-708.
- 777 14. Das SC, Nayak D, Zhou Y, Pattnaik AK. 2006. Visualization of intracellular transport of  
778 vesicular stomatitis virus nucleocapsids in living cells. *J Virol* 80:6368-77.

- 779 15. Ringel M, Heiner A, Behner L, Halwe S, Sauerhering L, Becker N, Dietzel E, Sawatsky  
780 B, Kolesnikova L, Maisner A. 2019. Nipah virus induces two inclusion body populations:  
781 Identification of novel inclusions at the plasma membrane. *PLoS Pathog* 15:e1007733.
- 782 16. Lahaye X, Vidy A, Pomier C, Obiang L, Harper F, Gaudin Y, Blondel D. 2009. Functional  
783 characterization of Negri bodies (NBs) in rabies virus-infected cells: Evidence that NBs  
784 are sites of viral transcription and replication. *J Virol* 83:7948-58.
- 785 17. Hoenen T, Shabman RS, Groseth A, Herwig A, Weber M, Schudt G, Dolnik O, Basler  
786 CF, Becker S, Feldmann H. 2012. Inclusion bodies are a site of ebolavirus replication. *J*  
787 *Virol* 86:11779-88.
- 788 18. Olejnik J, Ryabchikova E, Corley RB, Muhlberger E. 2011. Intracellular events and cell  
789 fate in filovirus infection. *Viruses* 3:1501-31.
- 790 19. Dolnik O, Stevermann L, Kolesnikova L, Becker S. 2015. Marburg virus inclusions: A  
791 virus-induced microcompartment and interface to multivesicular bodies and the late  
792 endosomal compartment. *Eur J Cell Biol* 94:323-31.
- 793 20. Nelson EV, Schmidt KM, Deflube LR, Doganay S, Banadyga L, Olejnik J, Hume AJ,  
794 Ryabchikova E, Ebihara H, Kedersha N, Ha T, Muhlberger E. 2016. Ebola Virus Does  
795 Not Induce Stress Granule Formation during Infection and Sequesters Stress Granule  
796 Proteins within Viral Inclusions. *J Virol* 90:7268-7284.
- 797 21. Lindquist ME, Lifland AW, Utley TJ, Santangelo PJ, Crowe JE, Jr. 2010. Respiratory  
798 syncytial virus induces host RNA stress granules to facilitate viral replication. *J Virol*  
799 84:12274-84.
- 800 22. Lifland AW, Jung J, Alonas E, Zurla C, Crowe JE, Jr., Santangelo PJ. 2012. Human  
801 respiratory syncytial virus nucleoprotein and inclusion bodies antagonize the innate  
802 immune response mediated by MDA5 and MAVS. *J Virol* 86:8245-58.

- 803 23. Fricke J, Koo LY, Brown CR, Collins PL. 2013. p38 and OGT sequestration into viral  
804 inclusion bodies in cells infected with human respiratory syncytial virus suppresses MK2  
805 activities and stress granule assembly. *J Virol* 87:1333-47.
- 806 24. Fang J, Pietzsch C, Ramanathan P, Santos RI, Ilinykh PA, Garcia-Blanco MA, Bukreyev  
807 A, Bradrick SS. 2018. Stauf1 Interacts with Multiple Components of the Ebola Virus  
808 Ribonucleoprotein and Enhances Viral RNA Synthesis. *MBio* 9.
- 809 25. Wendt L, Brandt J, Bodmer BS, Reiche S, Schmidt ML, Traeger S, Hoenen T. 2020. The  
810 Ebola Virus Nucleoprotein Recruits the Nuclear RNA Export Factor NXF1 into Inclusion  
811 Bodies to Facilitate Viral Protein Expression. *Cells* 9.
- 812 26. Nikolic J, Le Bars R, Lama Z, Scrima N, Lagaudriere-Gesbert C, Gaudin Y, Blondel D.  
813 2017. Negri bodies are viral factories with properties of liquid organelles. *Nat Commun*  
814 8:58.
- 815 27. Heinrich BS, Maliga Z, Stein DA, Hyman AA, Whelan SPJ. 2018. Phase Transitions  
816 Drive the Formation of Vesicular Stomatitis Virus Replication Compartments. *MBio* 9.
- 817 28. Nikolic J, Civas A, Lama Z, Lagaudriere-Gesbert C, Blondel D. 2016. Rabies Virus  
818 Infection Induces the Formation of Stress Granules Closely Connected to the Viral  
819 Factories. *PLoS Pathog* 12:e1005942.
- 820 29. Kolesnikova L, Nanbo A, Becker S, Kawaoka Y. 2017. Inside the Cell: Assembly of  
821 Filoviruses. *Curr Top Microbiol Immunol* 411:353-380.
- 822 30. Nanbo A, Watanabe S, Halfmann P, Kawaoka Y. 2013. The spatio-temporal distribution  
823 dynamics of Ebola virus proteins and RNA in infected cells. *Sci Rep* 3:1206.
- 824 31. Basler CF, Krogan NJ, Leung DW, Amarasinghe GK. 2019. Virus and host interactions  
825 critical for filoviral RNA synthesis as therapeutic targets. *Antiviral Res* 162:90-100.
- 826 32. Kirchdoerfer RN, Wasserman H, Amarasinghe GK, Saphire EO. 2017. Filovirus  
827 Structural Biology: The Molecules in the Machine. *Curr Top Microbiol Immunol* 411:381-  
828 417.

- 829 33. Noda T, Ebihara H, Muramoto Y, Fujii K, Takada A, Sagara H, Kim JH, Kida H,  
830 Feldmann H, Kawaoka Y. 2006. Assembly and budding of Ebolavirus. *PLoS Pathog*  
831 2:e99.
- 832 34. Becker S, Rinne C, Hofsass U, Klenk HD, Muhlberger E. 1998. Interactions of Marburg  
833 virus nucleocapsid proteins. *Virology* 249:406-17.
- 834 35. Groseth A, Charton JE, Sauerborn M, Feldmann F, Jones SM, Hoenen T, Feldmann H.  
835 2009. The Ebola virus ribonucleoprotein complex: a novel VP30-L interaction identified.  
836 *Virus Res* 140:8-14.
- 837 36. Noda T, Watanabe S, Sagara H, Kawaoka Y. 2007. Mapping of the VP40-binding  
838 regions of the nucleoprotein of Ebola virus. *J Virol* 81:3554-62.
- 839 37. Modrof J, Moritz C, Kolesnikova L, Konakova T, Hartlieb B, Randolph A, Muhlberger E,  
840 Becker S. 2001. Phosphorylation of Marburg virus VP30 at serines 40 and 42 is critical  
841 for its interaction with NP inclusions. *Virology* 287:171-82.
- 842 38. Mateo M, Reid SP, Leung LW, Basler CF, Volchkov VE. 2010. Ebolavirus VP24 binding  
843 to karyopherins is required for inhibition of interferon signaling. *J Virol* 84:1169-75.
- 844 39. Boehmann Y, Enterlein S, Randolph A, Muhlberger E. 2005. A reconstituted replication  
845 and transcription system for Ebola virus Reston and comparison with Ebola virus Zaire.  
846 *Virology* 332:406-17.
- 847 40. Muhlberger E, Lotfering B, Klenk HD, Becker S. 1998. Three of the four nucleocapsid  
848 proteins of Marburg virus, NP, VP35, and L, are sufficient to mediate replication and  
849 transcription of Marburg virus-specific monocistronic minigenomes. *J Virol* 72:8756-64.
- 850 41. Leung DW, Prins KC, Basler CF, Amarasinghe GK. 2010. Ebolavirus VP35 is a  
851 multifunctional virulence factor. *Virulence* 1:526-31.
- 852 42. Huang Y, Xu L, Sun Y, Nabel GJ. 2002. The assembly of Ebola virus nucleocapsid  
853 requires virion-associated proteins 35 and 24 and posttranslational modification of  
854 nucleoprotein. *Mol Cell* 10:307-16.

- 855 43. Kirchdoerfer RN, Abelson DM, Li S, Wood MR, Saphire EO. 2015. Assembly of the  
856 Ebola Virus Nucleoprotein from a Chaperoned VP35 Complex. *Cell Rep* 12:140-149.
- 857 44. Leung DW, Borek D, Luthra P, Binning JM, Anantpadma M, Liu G, Harvey IB, Su Z,  
858 Endlich-Frazier A, Pan J, Shabman RS, Chiu W, Davey RA, Otwinowski Z, Basler CF,  
859 Amarasinghe GK. 2015. An Intrinsically Disordered Peptide from Ebola Virus VP35  
860 Controls Viral RNA Synthesis by Modulating Nucleoprotein-RNA Interactions. *Cell Rep*  
861 11:376-89.
- 862 45. Prins KC, Binning JM, Shabman RS, Leung DW, Amarasinghe GK, Basler CF. 2010.  
863 Basic residues within the ebolavirus VP35 protein are required for its viral polymerase  
864 cofactor function. *J Virol* 84:10581-91.
- 865 46. Noda T, Kolesnikova L, Becker S, Kawaoka Y. 2011. The importance of the NP: VP35  
866 ratio in Ebola virus nucleocapsid formation. *J Infect Dis* 204 Suppl 3:S878-83.
- 867 47. Shu T, Gan T, Bai P, Wang X, Qian Q, Zhou H, Cheng Q, Qiu Y, Yin L, Zhong J, Zhou  
868 X. 2019. Ebola virus VP35 has novel NTPase and helicase-like activities. *Nucleic Acids*  
869 *Res* 47:5837-5851.
- 870 48. Messaoudi I, Amarasinghe GK, Basler CF. 2015. Filovirus pathogenesis and immune  
871 evasion: insights from Ebola virus and Marburg virus. *Nat Rev Microbiol* 13:663-76.
- 872 49. Fanunza E, Frau A, Corona A, Tramontano E. 2018. Insights into Ebola Virus VP35 and  
873 VP24 Interferon inhibitory functions and their initial exploitation as drug targets. *Infect*  
874 *Disord Drug Targets* doi:10.2174/1871526519666181123145540.
- 875 50. Baker LE, Ellena JF, Handing KB, Derewenda U, Utepbergenov D, Engel DA,  
876 Derewenda ZS. 2016. Molecular architecture of the nucleoprotein C-terminal domain  
877 from the Ebola and Marburg viruses. *Acta Crystallogr D Struct Biol* 72:49-58.
- 878 51. Dziubanska PJ, Derewenda U, Ellena JF, Engel DA, Derewenda ZS. 2014. The  
879 structure of the C-terminal domain of the Zaire ebolavirus nucleoprotein. *Acta Crystallogr*  
880 *D Biol Crystallogr* 70:2420-9.

- 881 52. Radwanska MJ, Jaskolowski M, Davydova E, Derewenda U, Miyake T, Engel DA,  
882 Kossiakoff AA, Derewenda ZS. 2018. The structure of the C-terminal domain of the  
883 nucleoprotein from the Bundibugyo strain of the Ebola virus in complex with a pan-  
884 specific synthetic Fab. *Acta Crystallogr D Struct Biol* 74:681-689.
- 885 53. Lee W, Tonelli M, Wu C, Aceti DJ, Amarasinghe GK, Markley JL. 2019. Backbone  
886 resonance assignments and secondary structure of Ebola nucleoprotein 600-739  
887 construct. *Biomol NMR Assign* doi:10.1007/s12104-019-09898-7.
- 888 54. Biedenkopf N, Hoenen T. 2017. Modeling the Ebolavirus Life Cycle with Transcription  
889 and Replication-Competent Viruslike Particle Assays. *Methods Mol Biol* 1628:119-131.
- 890 55. Hoenen T, Watt A, Mora A, Feldmann H. 2014. Modeling the lifecycle of Ebola virus  
891 under biosafety level 2 conditions with virus-like particles containing tetracistronic  
892 minigenomes. *J Vis Exp* doi:10.3791/52381:52381.
- 893 56. Watt A, Moukambi F, Banadyga L, Groseth A, Callison J, Herwig A, Ebihara H,  
894 Feldmann H, Hoenen T. 2014. A novel life cycle modeling system for Ebola virus shows  
895 a genome length-dependent role of VP24 in virus infectivity. *J Virol* 88:10511-24.
- 896 57. Kirchdoerfer RN, Moyer CL, Abelson DM, Saphire EO. 2016. The Ebola Virus VP30-NP  
897 Interaction Is a Regulator of Viral RNA Synthesis. *PLoS Pathog* 12:e1005937.
- 898 58. Xu W, Luthra P, Wu C, Batra J, Leung DW, Basler CF, Amarasinghe GK. 2017. Ebola  
899 virus VP30 and nucleoprotein interactions modulate viral RNA synthesis. *Nat Commun*  
900 8:15576.
- 901 59. Leung DW, Ginder ND, Fulton DB, Nix J, Basler CF, Honzatko RB, Amarasinghe GK.  
902 2009. Structure of the Ebola VP35 interferon inhibitory domain. *Proc Natl Acad Sci U S*  
903 *A* 106:411-6.
- 904 60. Leung DW, Prins KC, Borek DM, Farahbakhsh M, Tufariello JM, Ramanan P, Nix JC,  
905 Helgeson LA, Otwinowski Z, Honzatko RB, Basler CF, Amarasinghe GK. 2010.

- 906 Structural basis for dsRNA recognition and interferon antagonism by Ebola VP35.  
907 Nature Structural & Molecular Biology 17:165.
- 908 61. Bharat TA, Noda T, Riches JD, Kraehling V, Kolesnikova L, Becker S, Kawaoka Y,  
909 Briggs JA. 2012. Structural dissection of Ebola virus and its assembly determinants  
910 using cryo-electron tomography. Proc Natl Acad Sci U S A 109:4275-80.
- 911 62. Bharat TA, Riches JD, Kolesnikova L, Welsch S, Kraehling V, Davey N, Parsy ML, Becker  
912 S, Briggs JA. 2011. Cryo-electron tomography of Marburg virus particles and their  
913 morphogenesis within infected cells. PLoS Biol 9:e1001196.
- 914 63. Brown CS, Lee MS, Leung DW, Wang T, Xu W, Luthra P, Anantpadma M, Shabman  
915 RS, Melito LM, MacMillan KS, Borek DM, Otwinowski Z, Ramanan P, Stubbs AJ,  
916 Peterson DS, Binning JM, Tonelli M, Olson MA, Davey RA, Ready JM, Basler CF,  
917 Amarasinghe GK. 2014. In silico derived small molecules bind the filovirus VP35 protein  
918 and inhibit its polymerase cofactor activity. J Mol Biol 426:2045-58.
- 919 64. Hoenen T, Groseth A, Kolesnikova L, Theriault S, Ebihara H, Hartlieb B, Bamberg S,  
920 Feldmann H, Stroher U, Becker S. 2006. Infection of naive target cells with virus-like  
921 particles: implications for the function of ebola virus VP24. J Virol 80:7260-4.
- 922 65. Nelson EA, Barnes AB, Wiehle RD, Fontenot GK, Hoenen T, White JM. 2016.  
923 Clomiphene and Its Isomers Block Ebola Virus Particle Entry and Infection with Similar  
924 Potency: Potential Therapeutic Implications. Viruses 8.
- 925 66. Dong S, Yang P, Li G, Liu B, Wang W, Liu X, Xia B, Yang C, Lou Z, Guo Y, Rao Z.  
926 2015. Insight into the Ebola virus nucleocapsid assembly mechanism: crystal structure of  
927 Ebola virus nucleoprotein core domain at 1.8 Å resolution. Protein Cell 6:351-62.
- 928



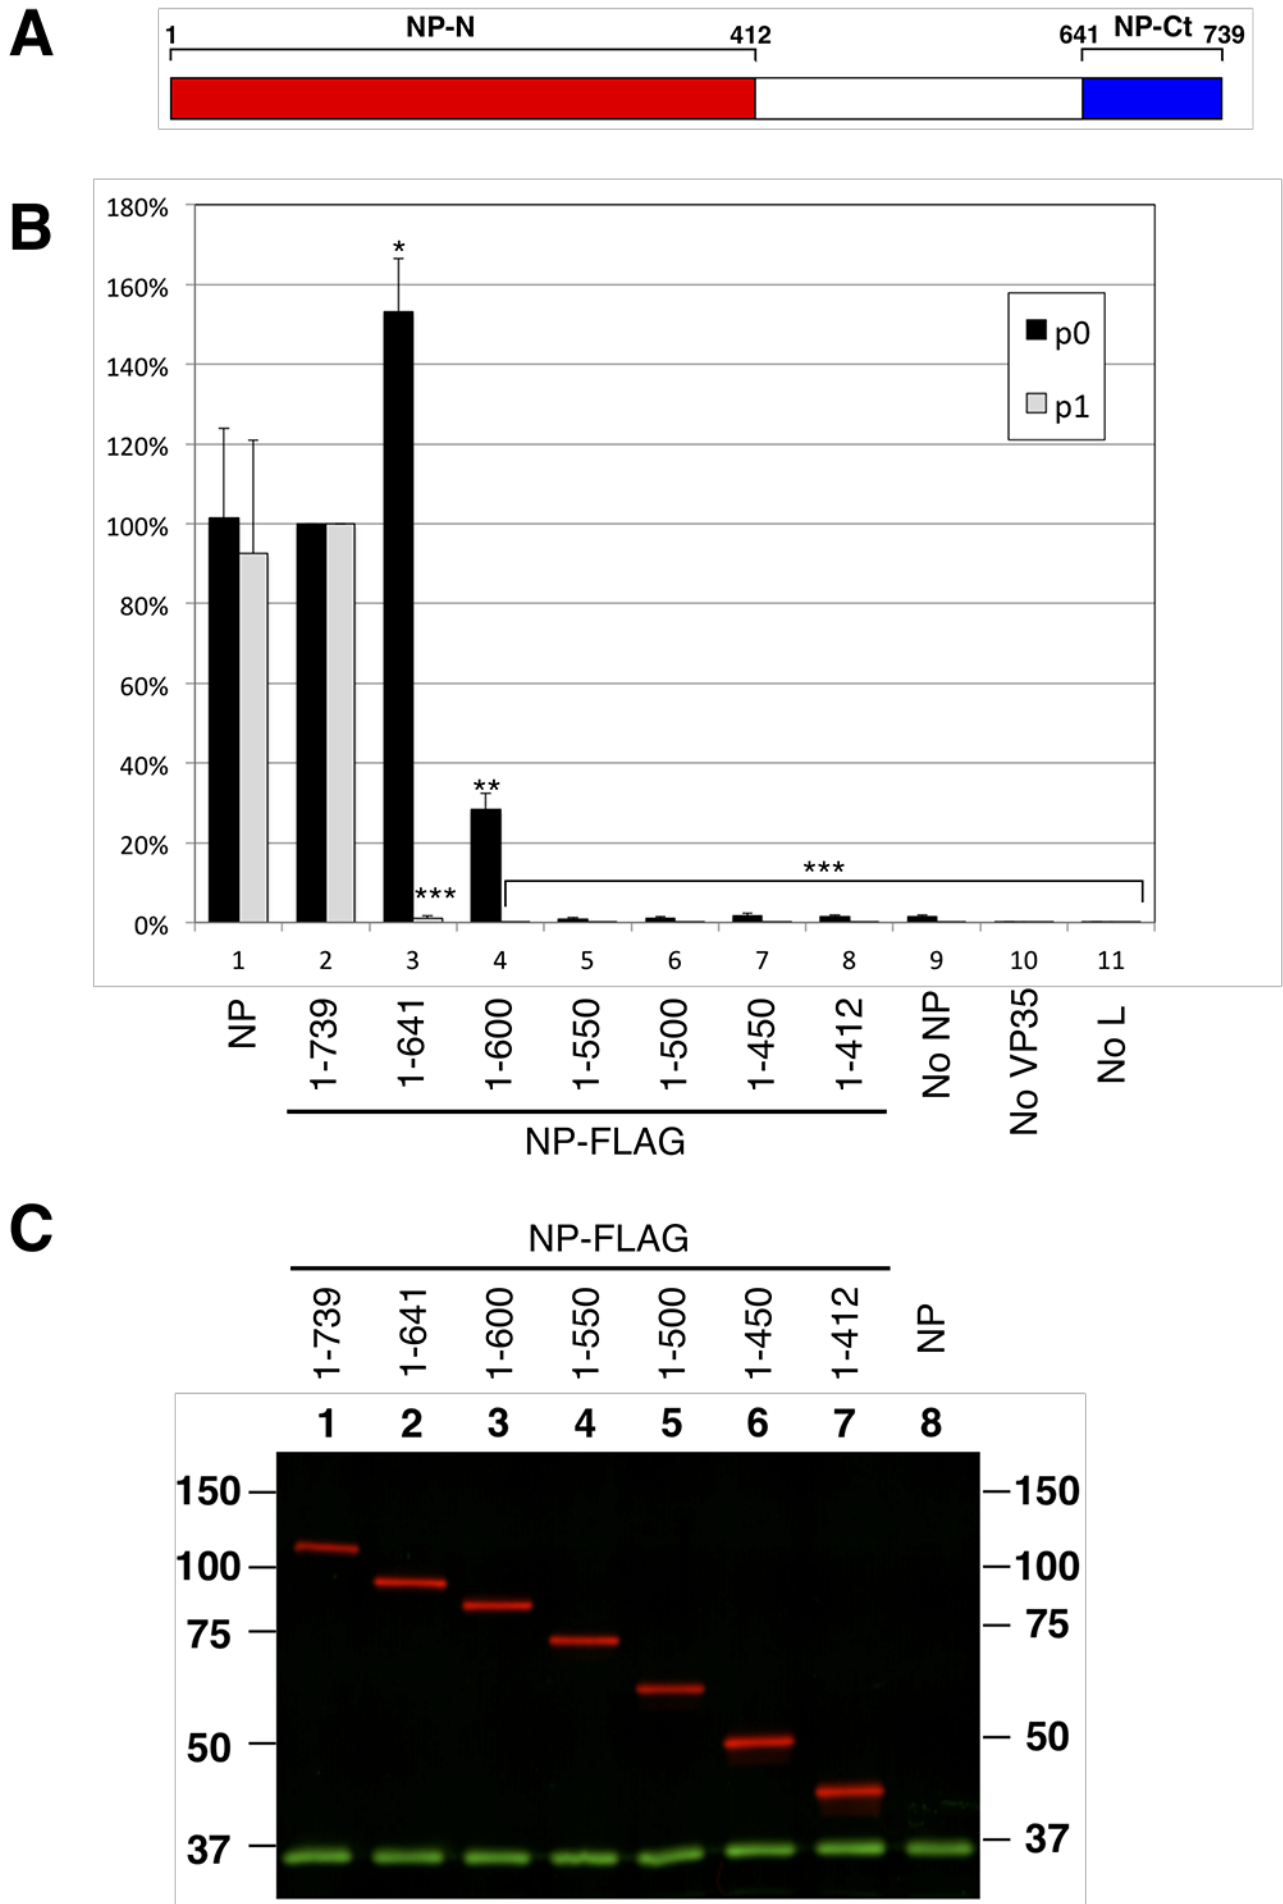

**D**

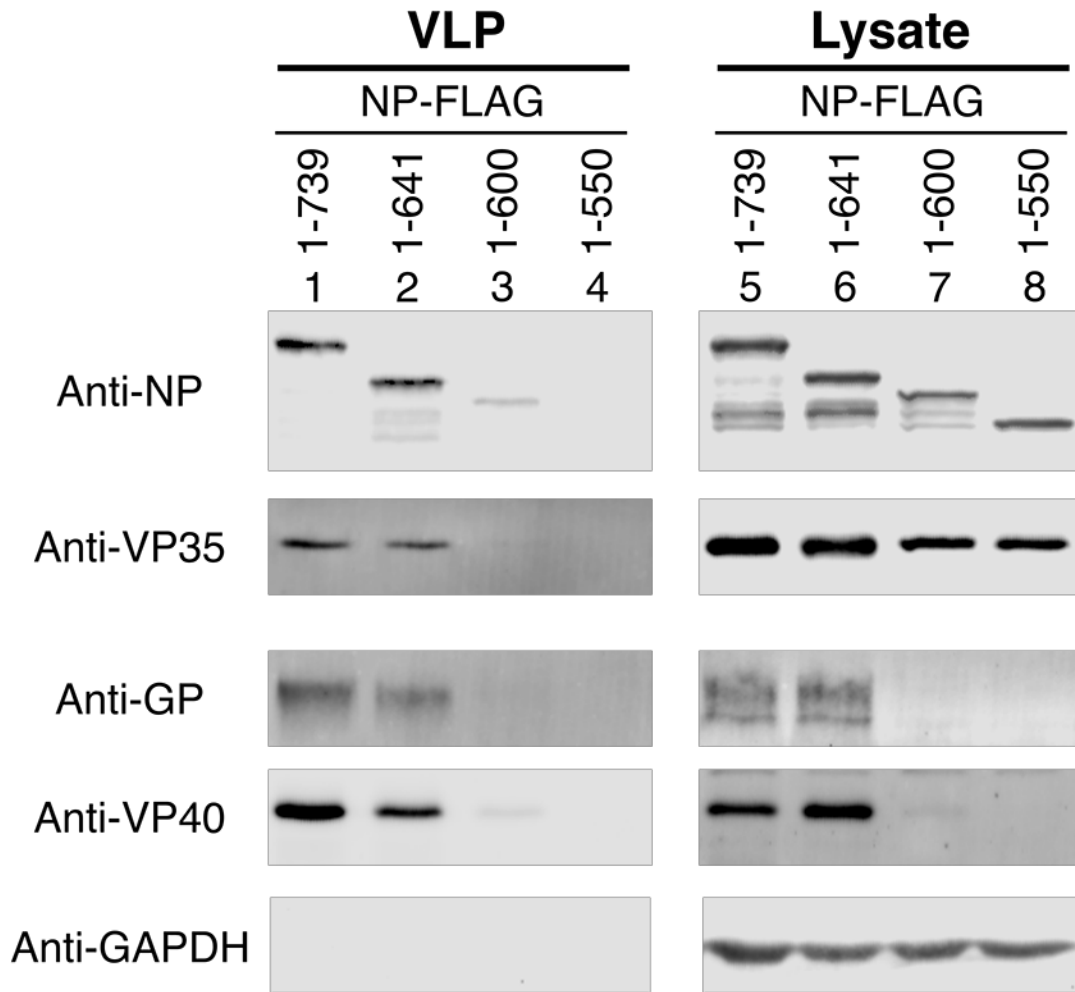

**E**

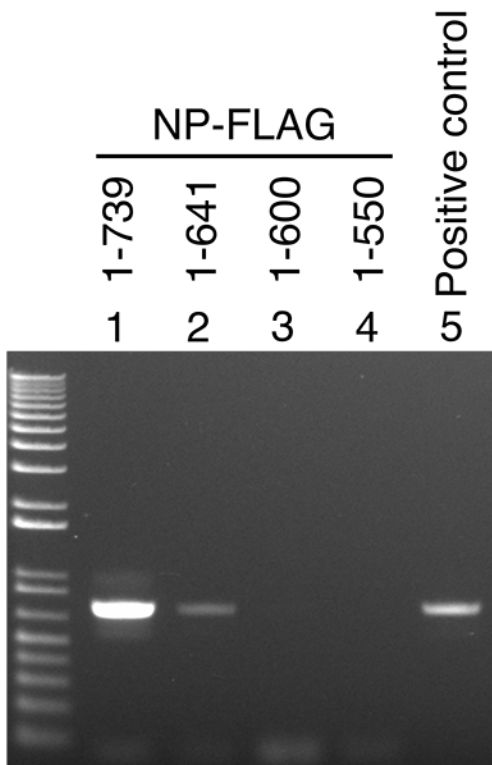

**F**

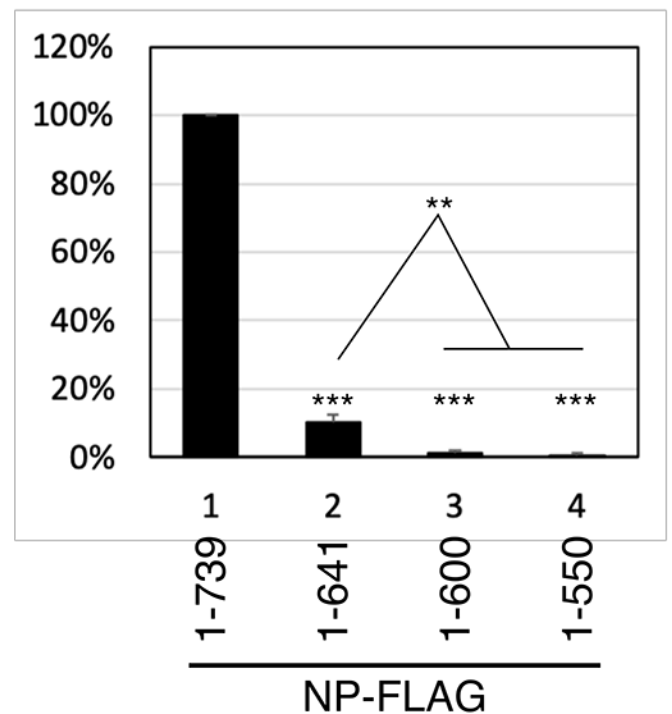

**A**

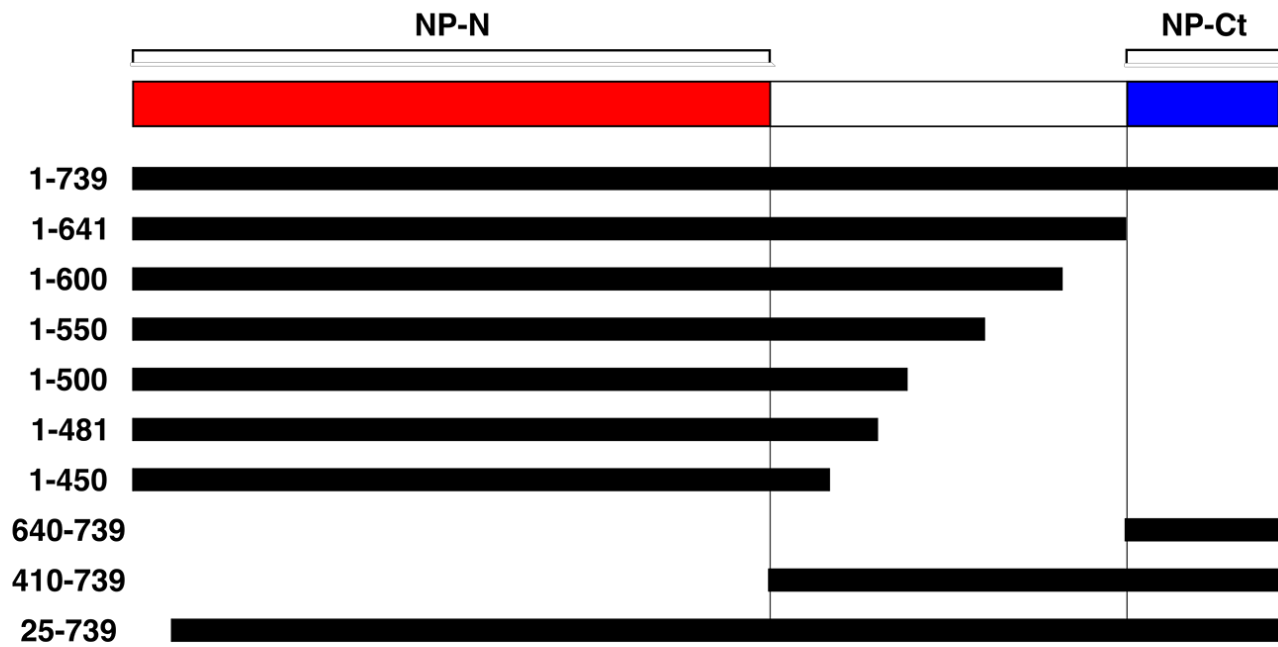

Miyake et al, Figure 2A

**B**

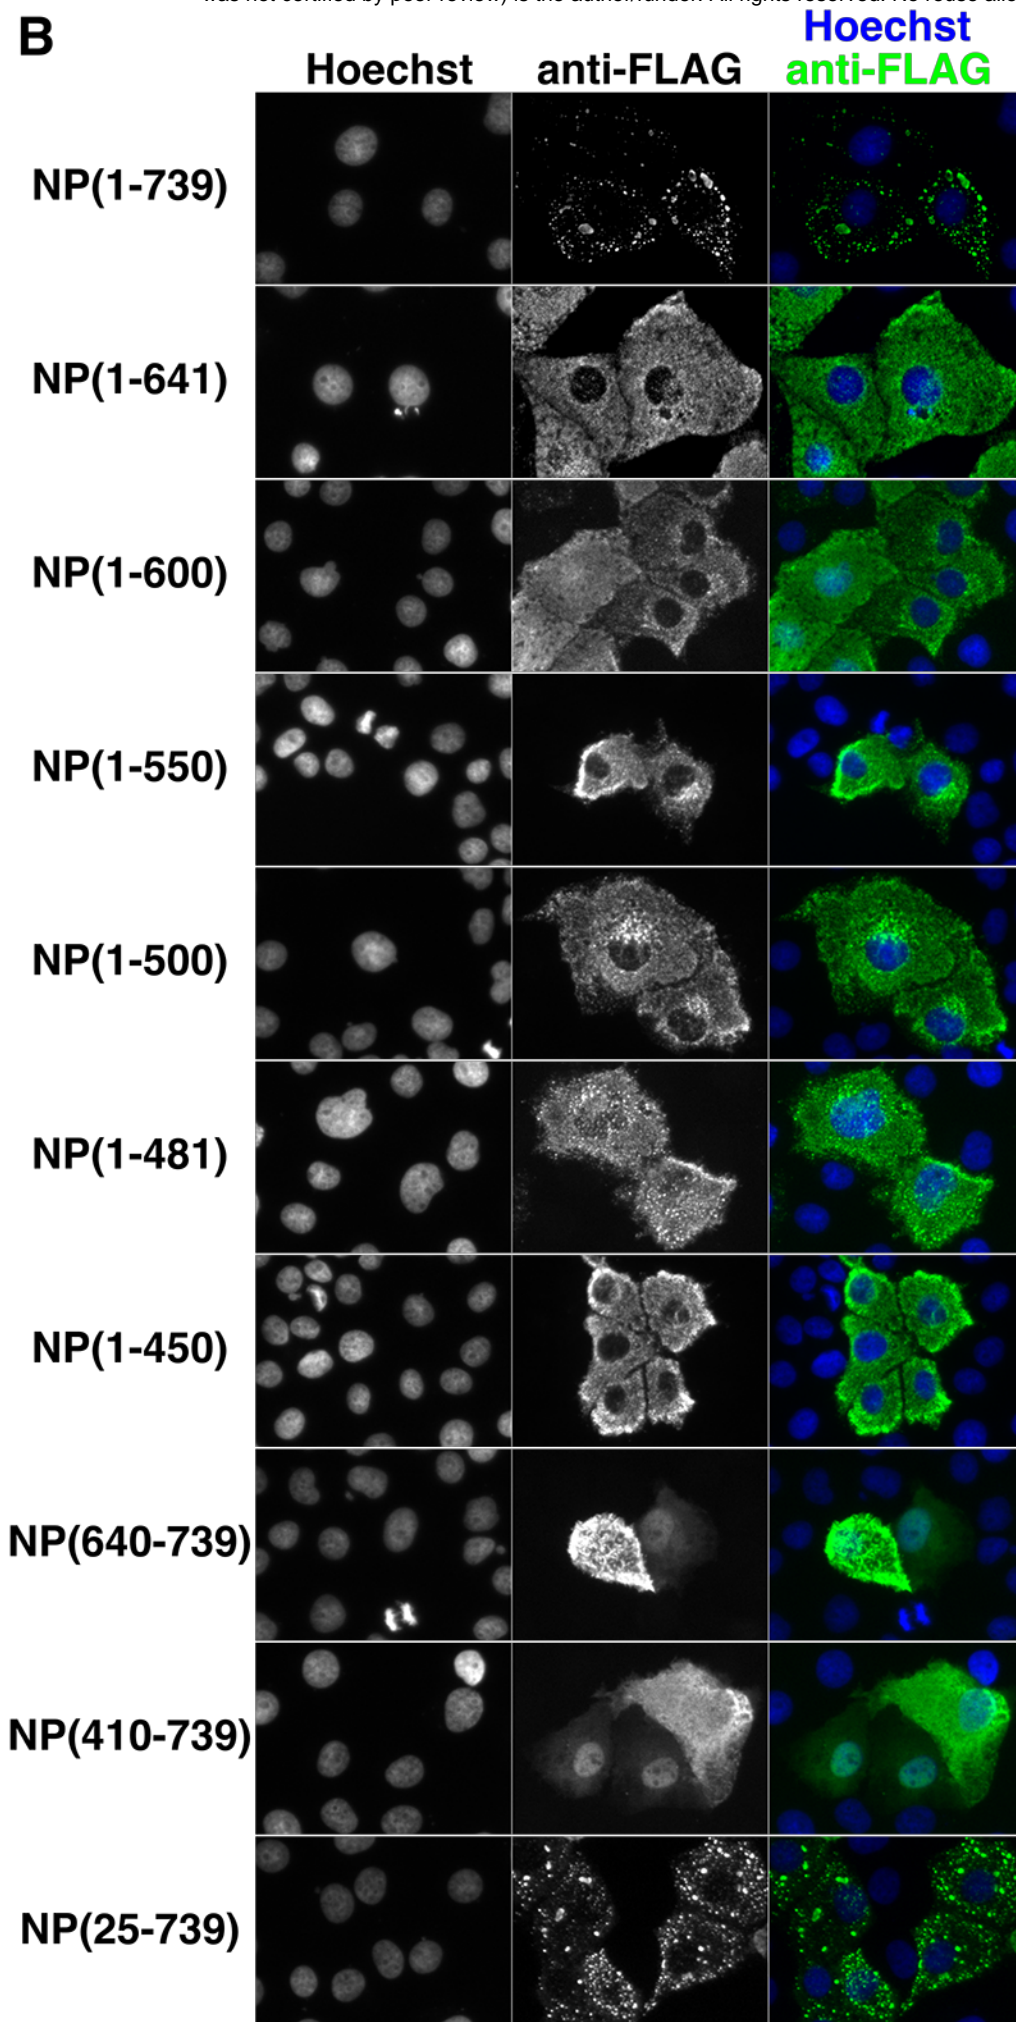

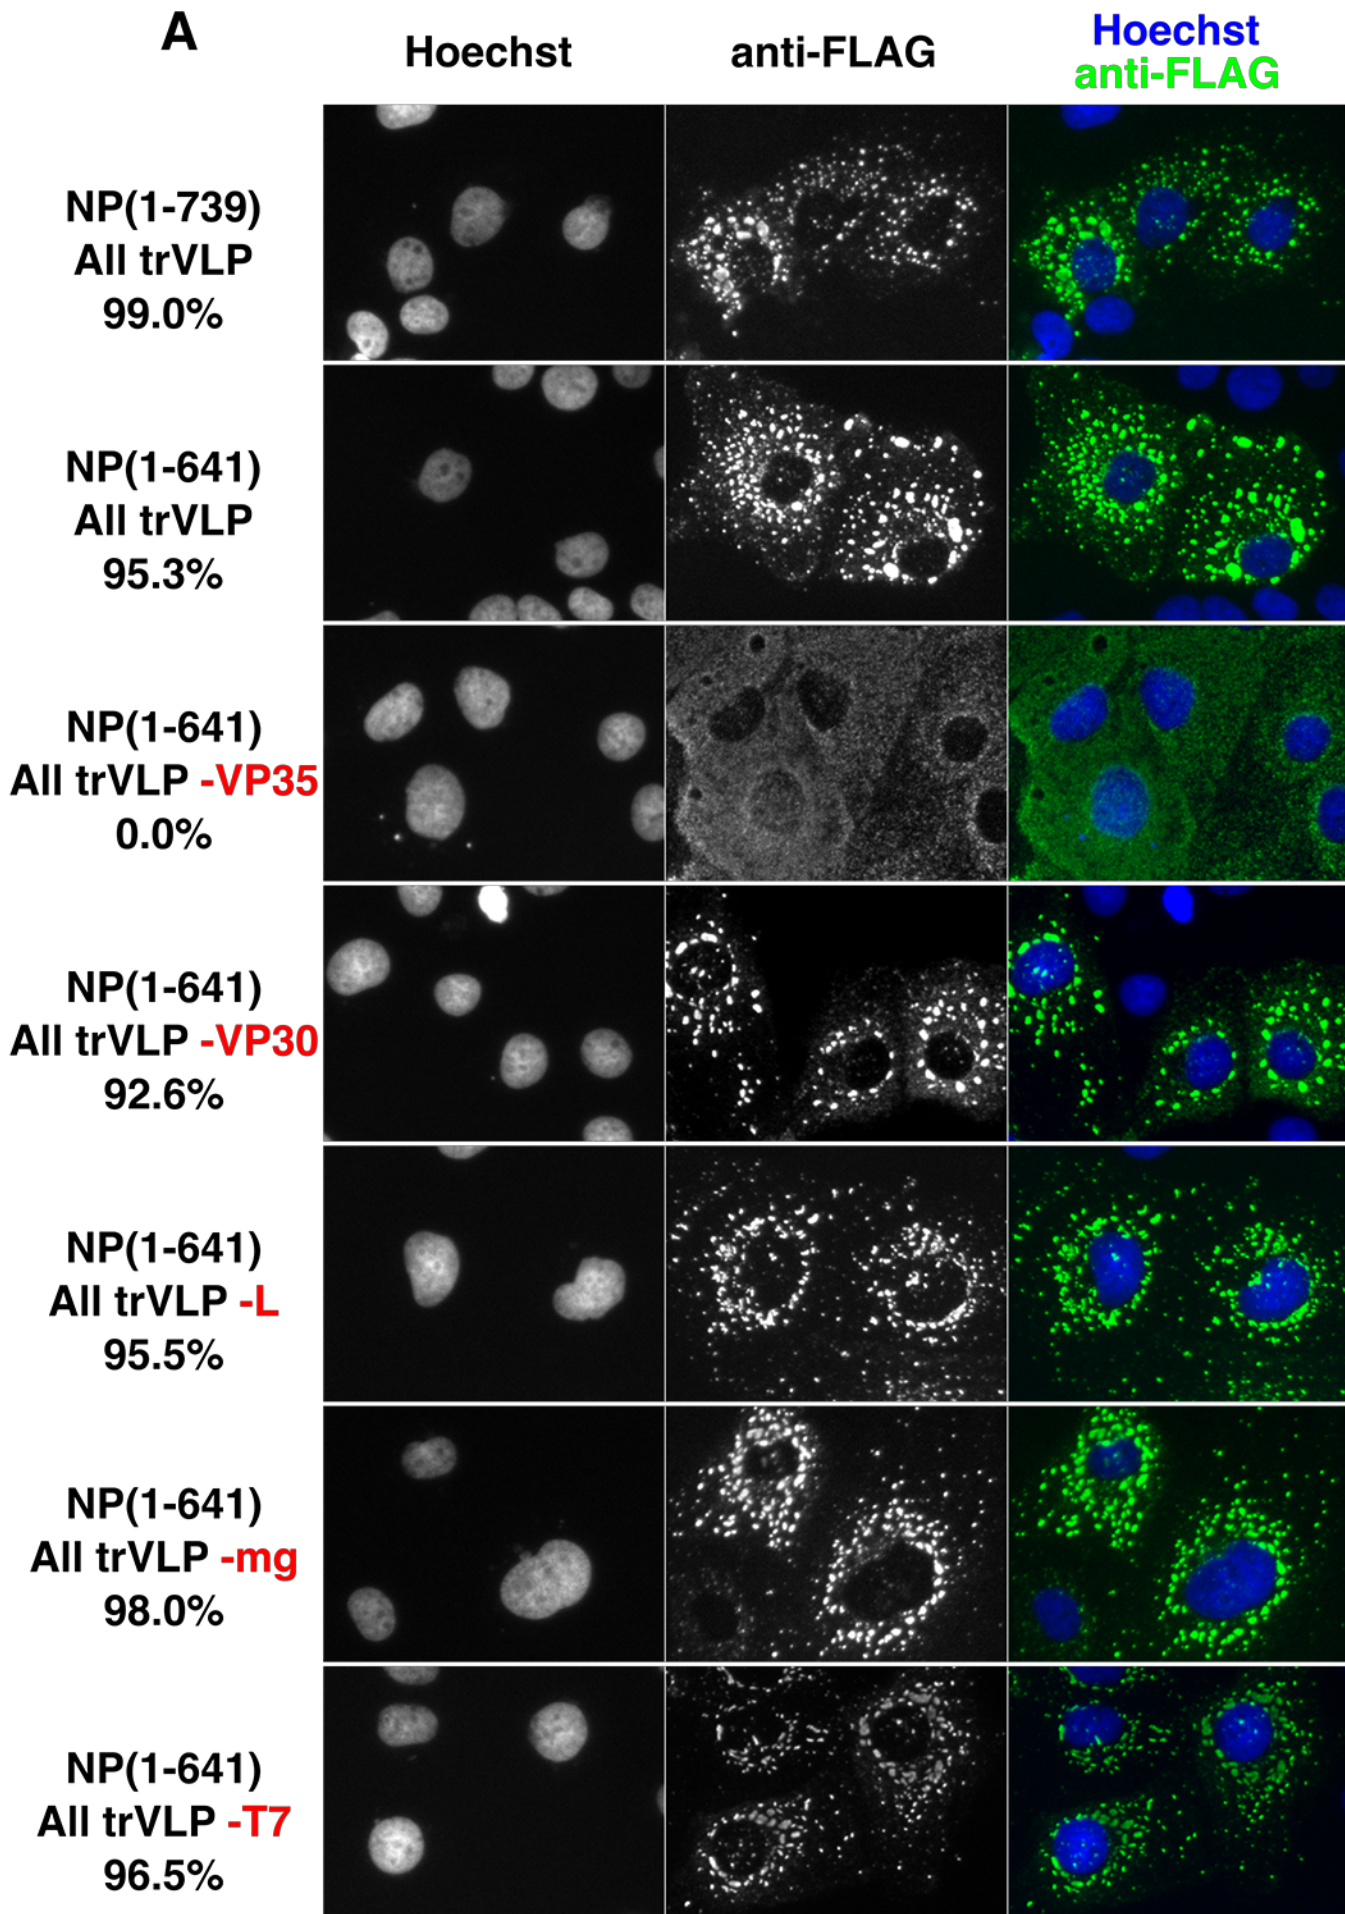

Miyake et al, Figure 3A

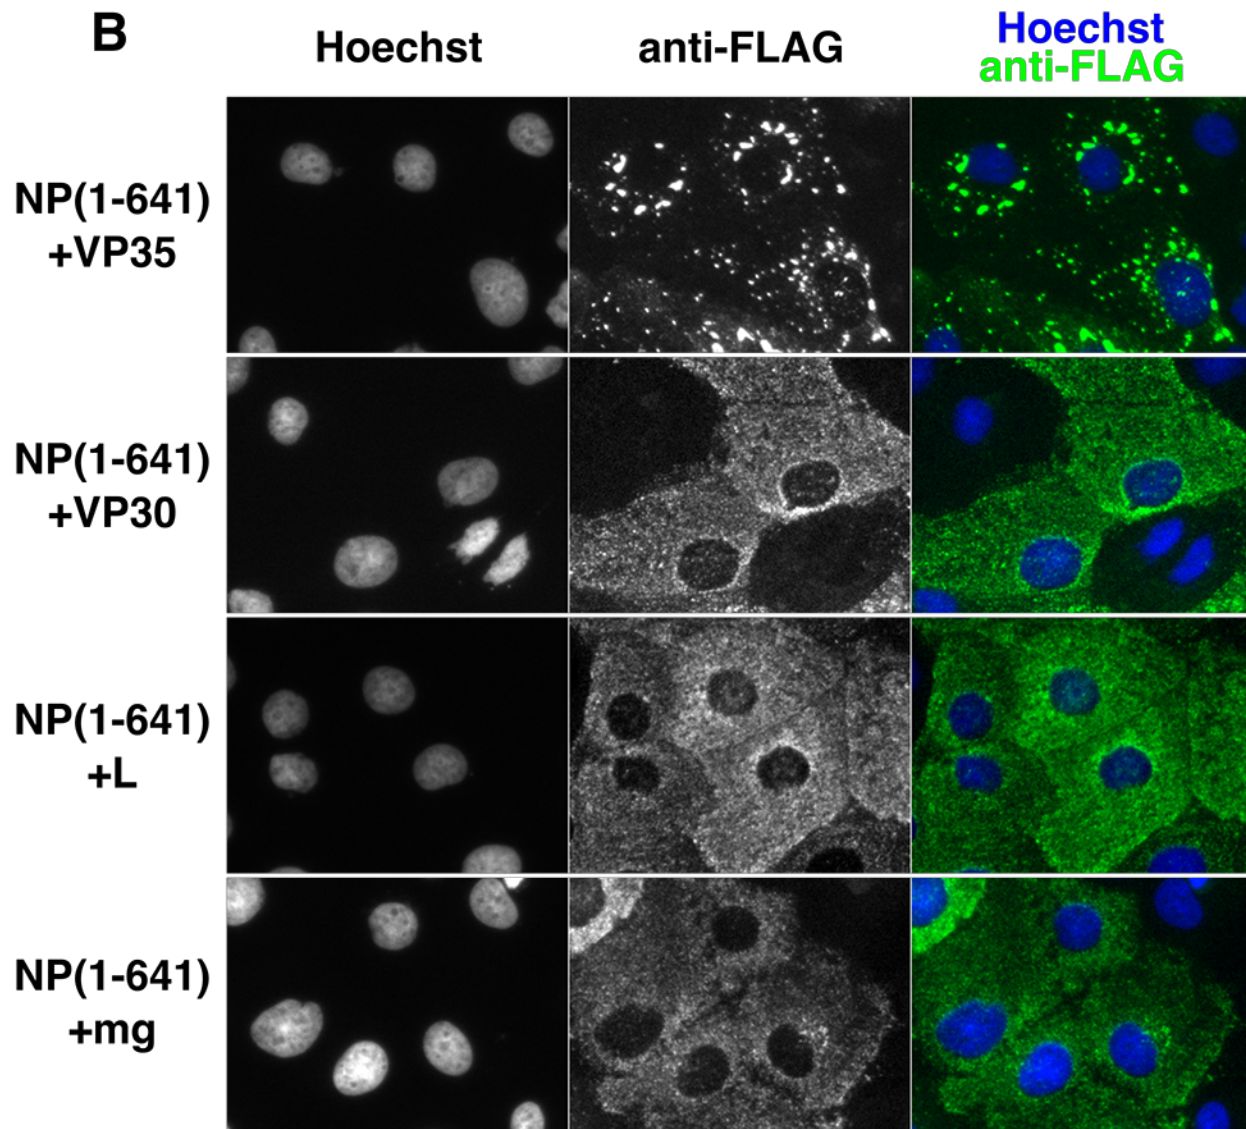

Miyake et al, Figure 3B

**A**

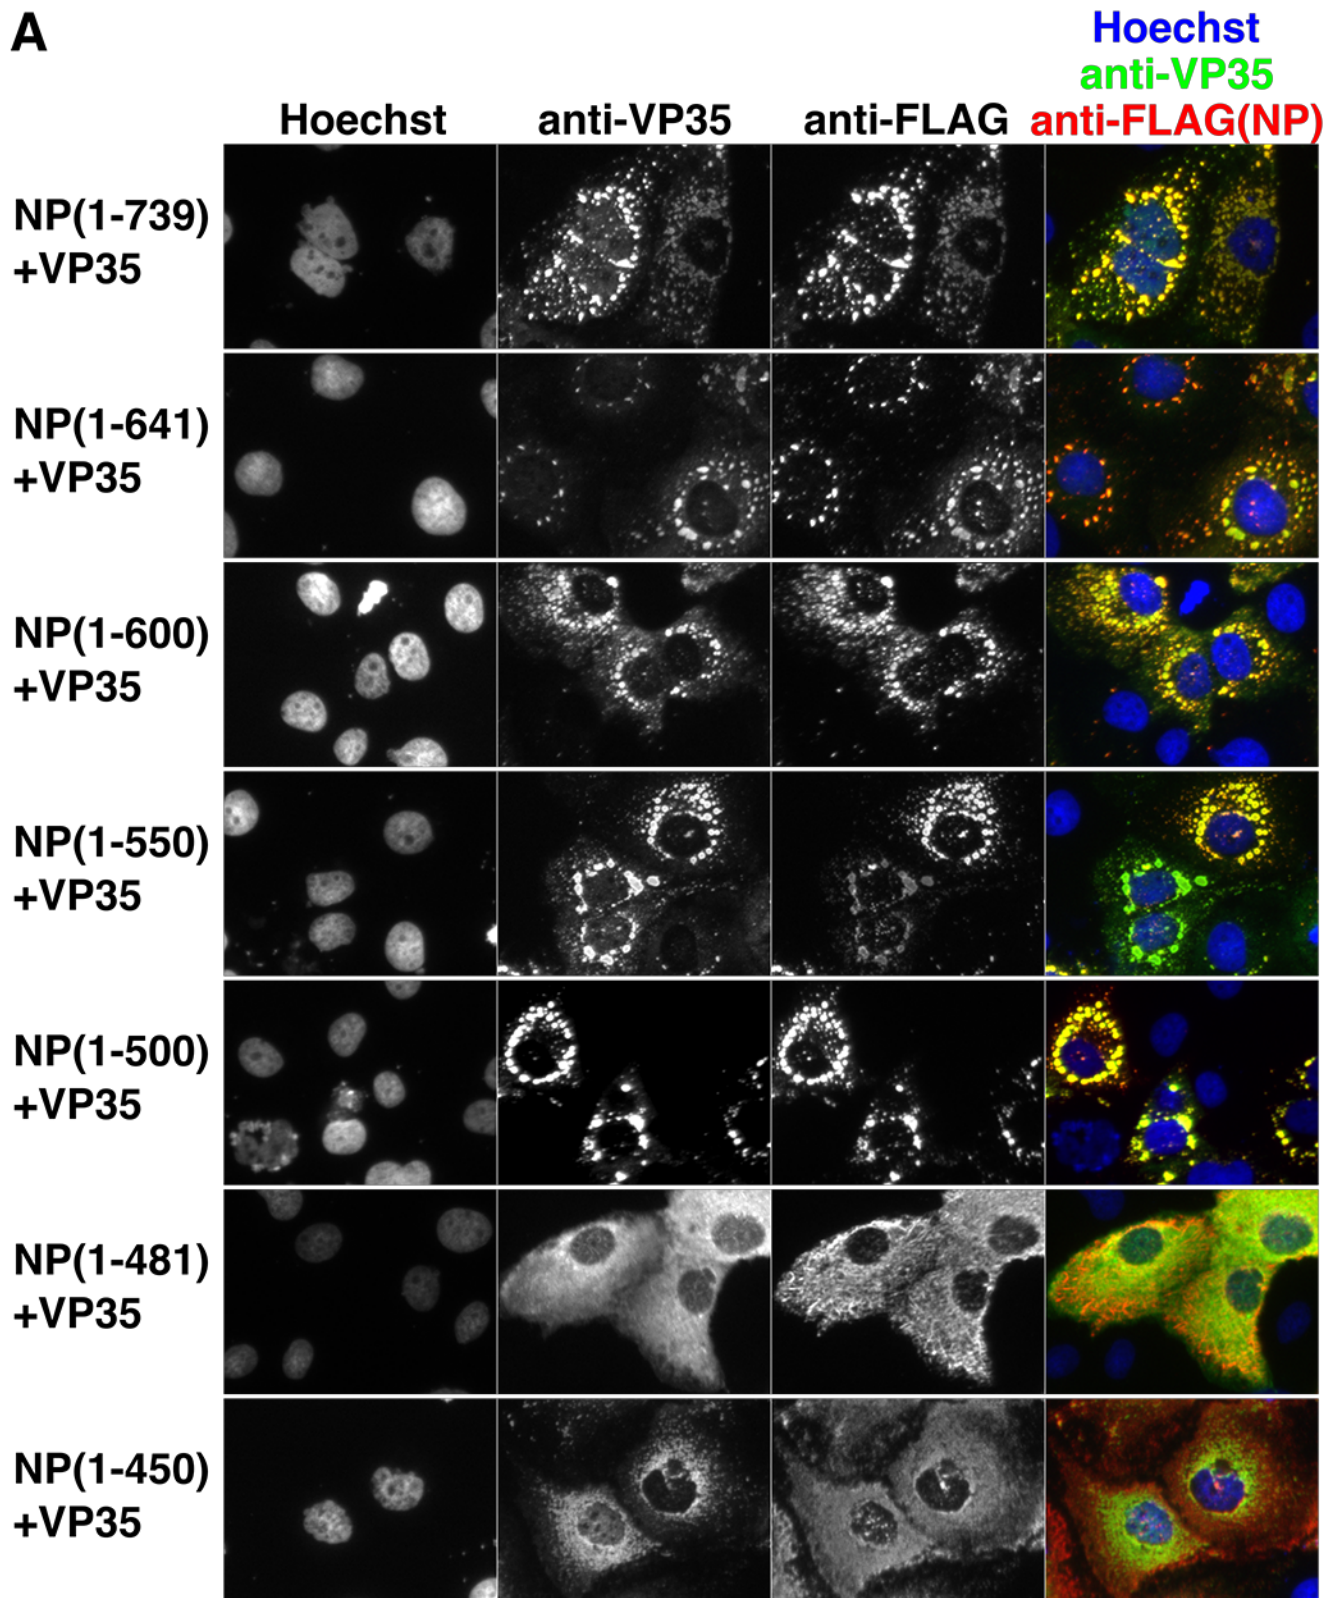

Miyake et al, Figure 4A

**B**

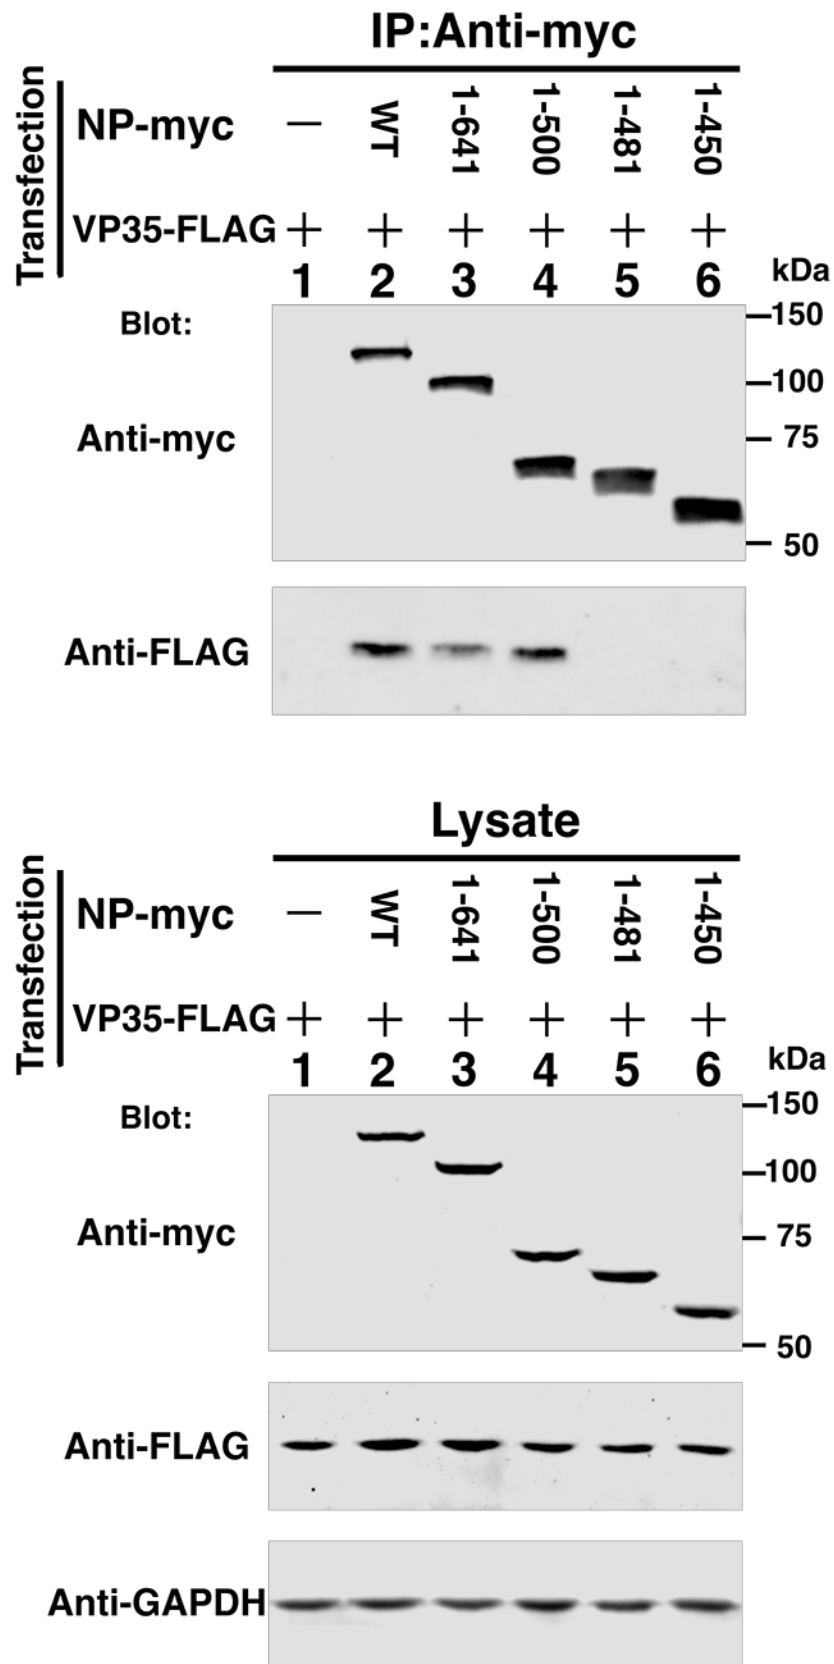



**A**

|            | 480                       | 490 | 500 |
|------------|---------------------------|-----|-----|
| EBOV       | PDDLVLFDLDEDEDTKPVPN      |     |     |
| SUDV       | TGDLDFNLDDDDSDQPGPP       |     |     |
| BDBV       | PDDLVLFDLEDEDDADNPAQN     |     |     |
| TAFV       | PEDLVLFDLEDGDEDDHRPSS     |     |     |
| RESTV      | AGDLVLFDLDDHEDDNKAFEP     |     |     |
| A (482-5)  | PDAAAAFDLDEDEDEDTKPVPN    |     |     |
| A (485-8)  | PDDLVA AAAA DEDEDEDTKPVPN |     |     |
| A (489-93) | PDDLVLFDLAAAAADTKPVPN     |     |     |

Miyake et al, Figure 5A

**B**

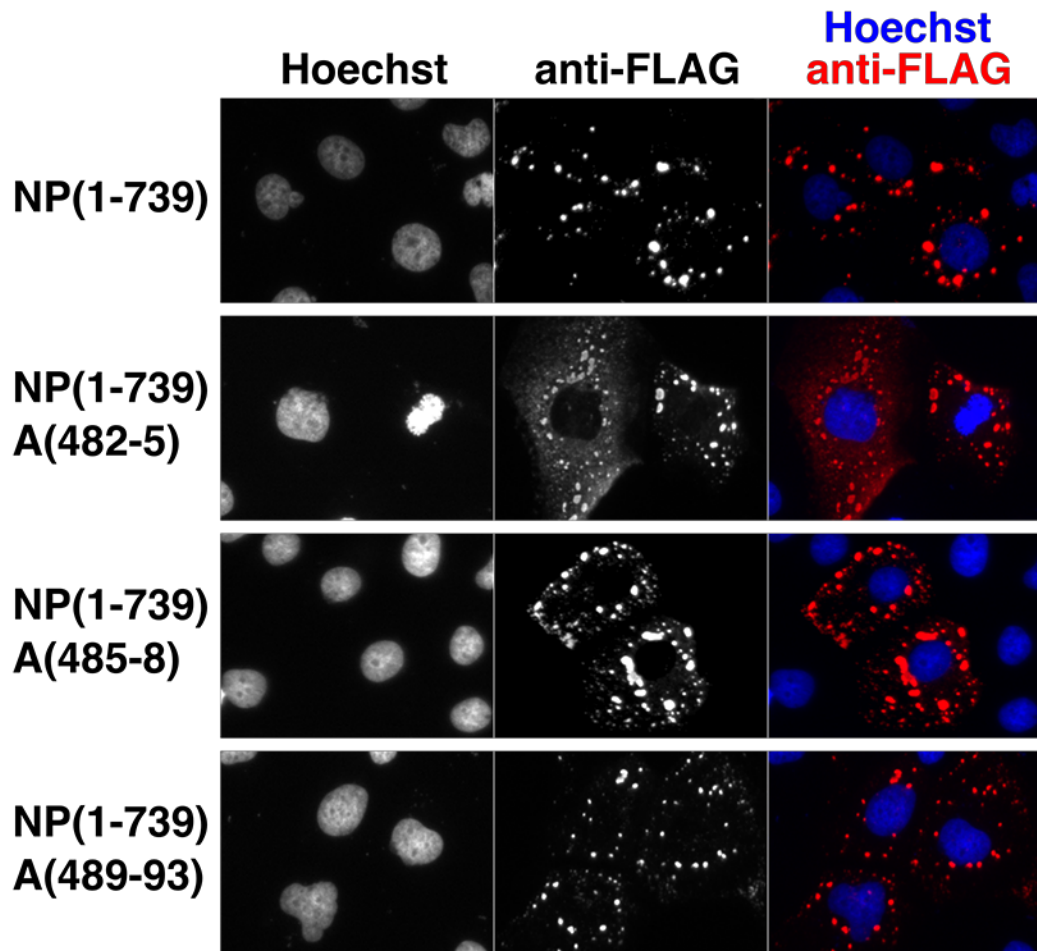

Miyake et al, Figure 5B

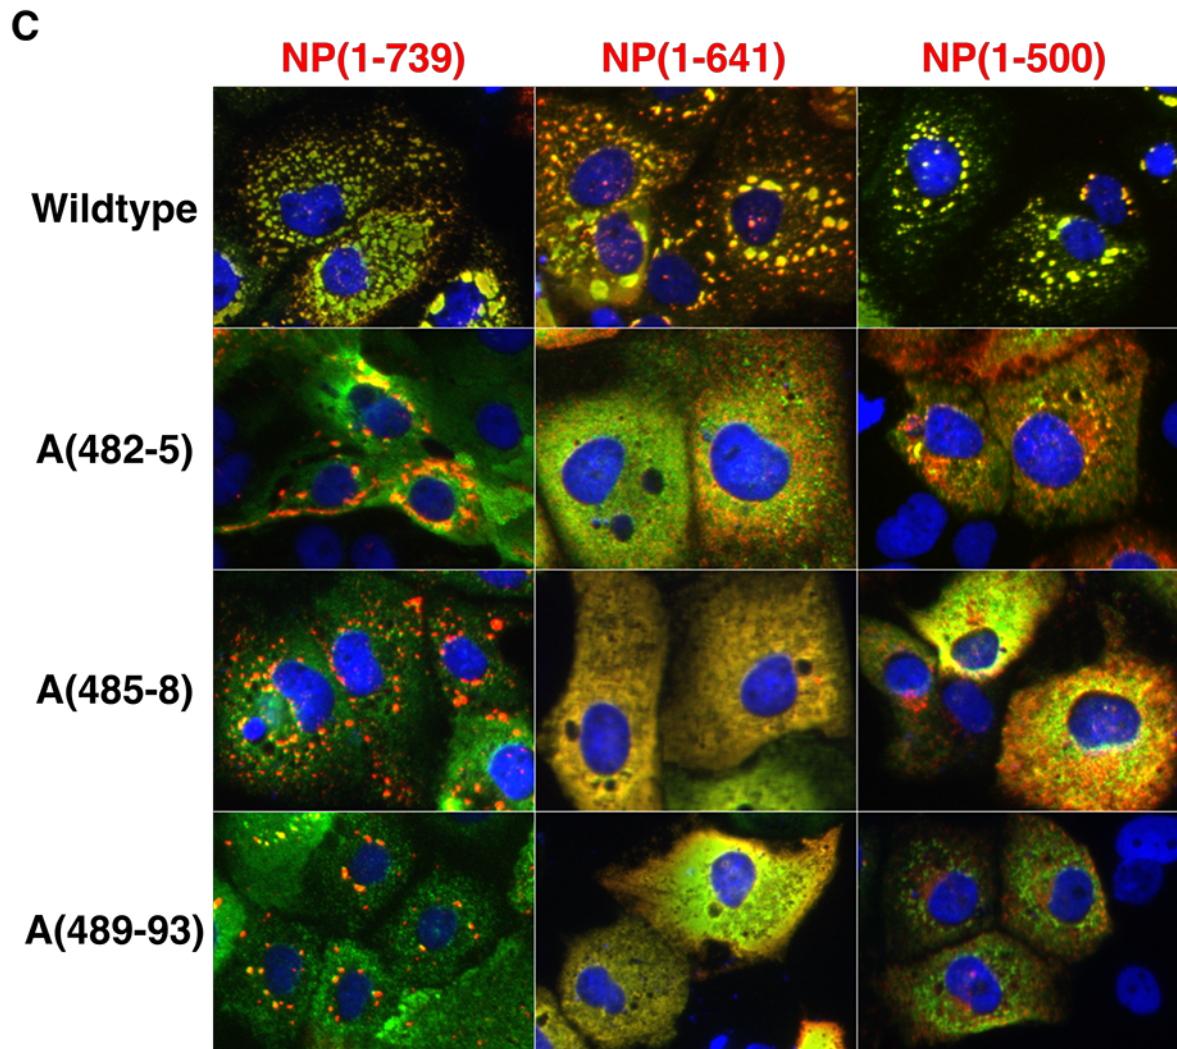

Miyake et al, Figure 5C

**D**

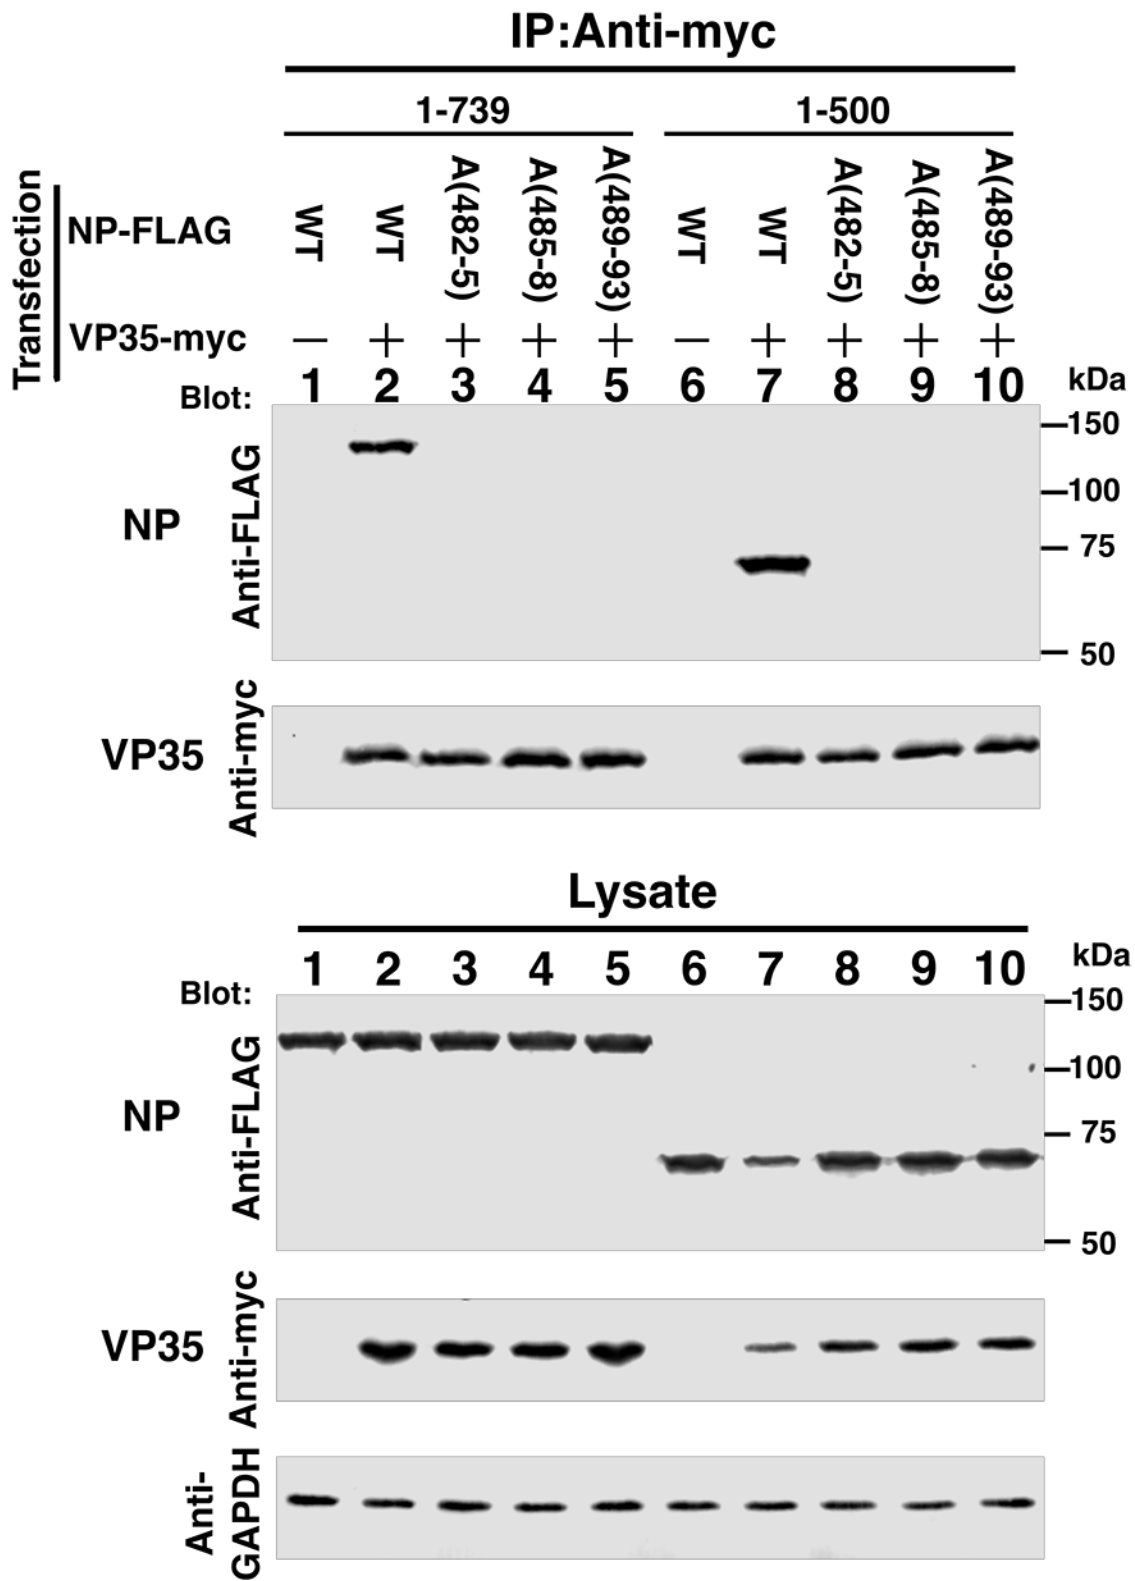

**A**

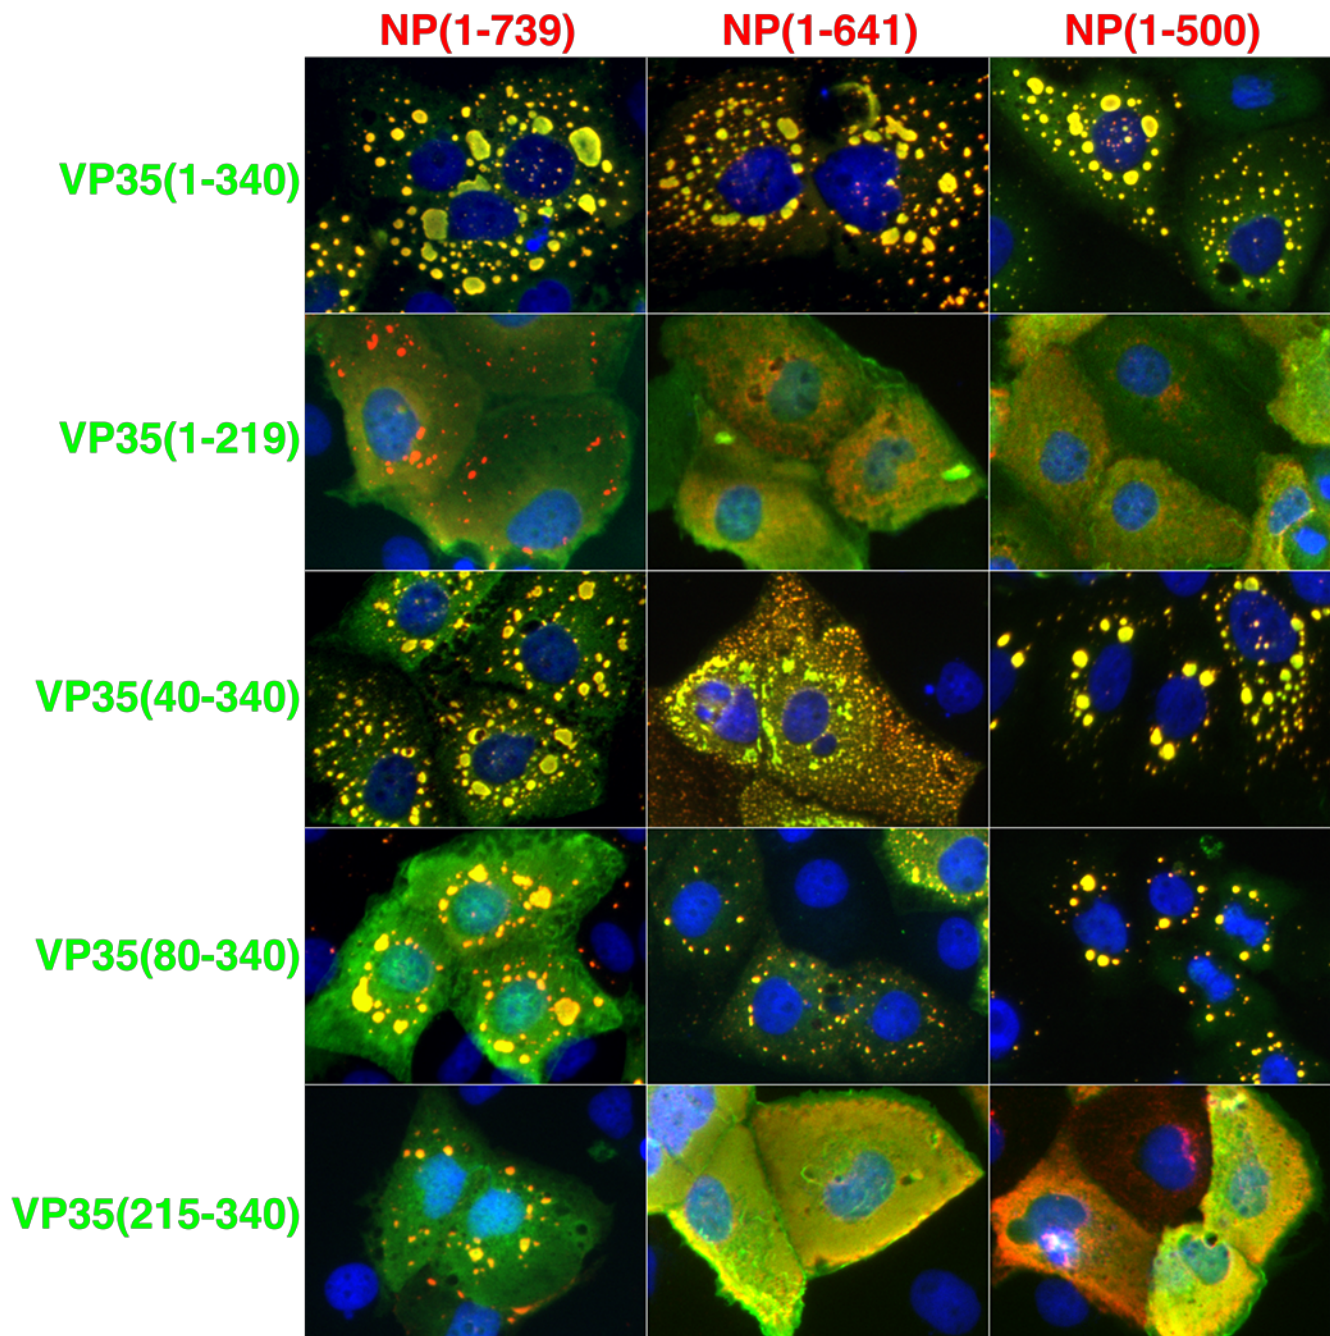

Miyake et al, Figure 6A

**B**

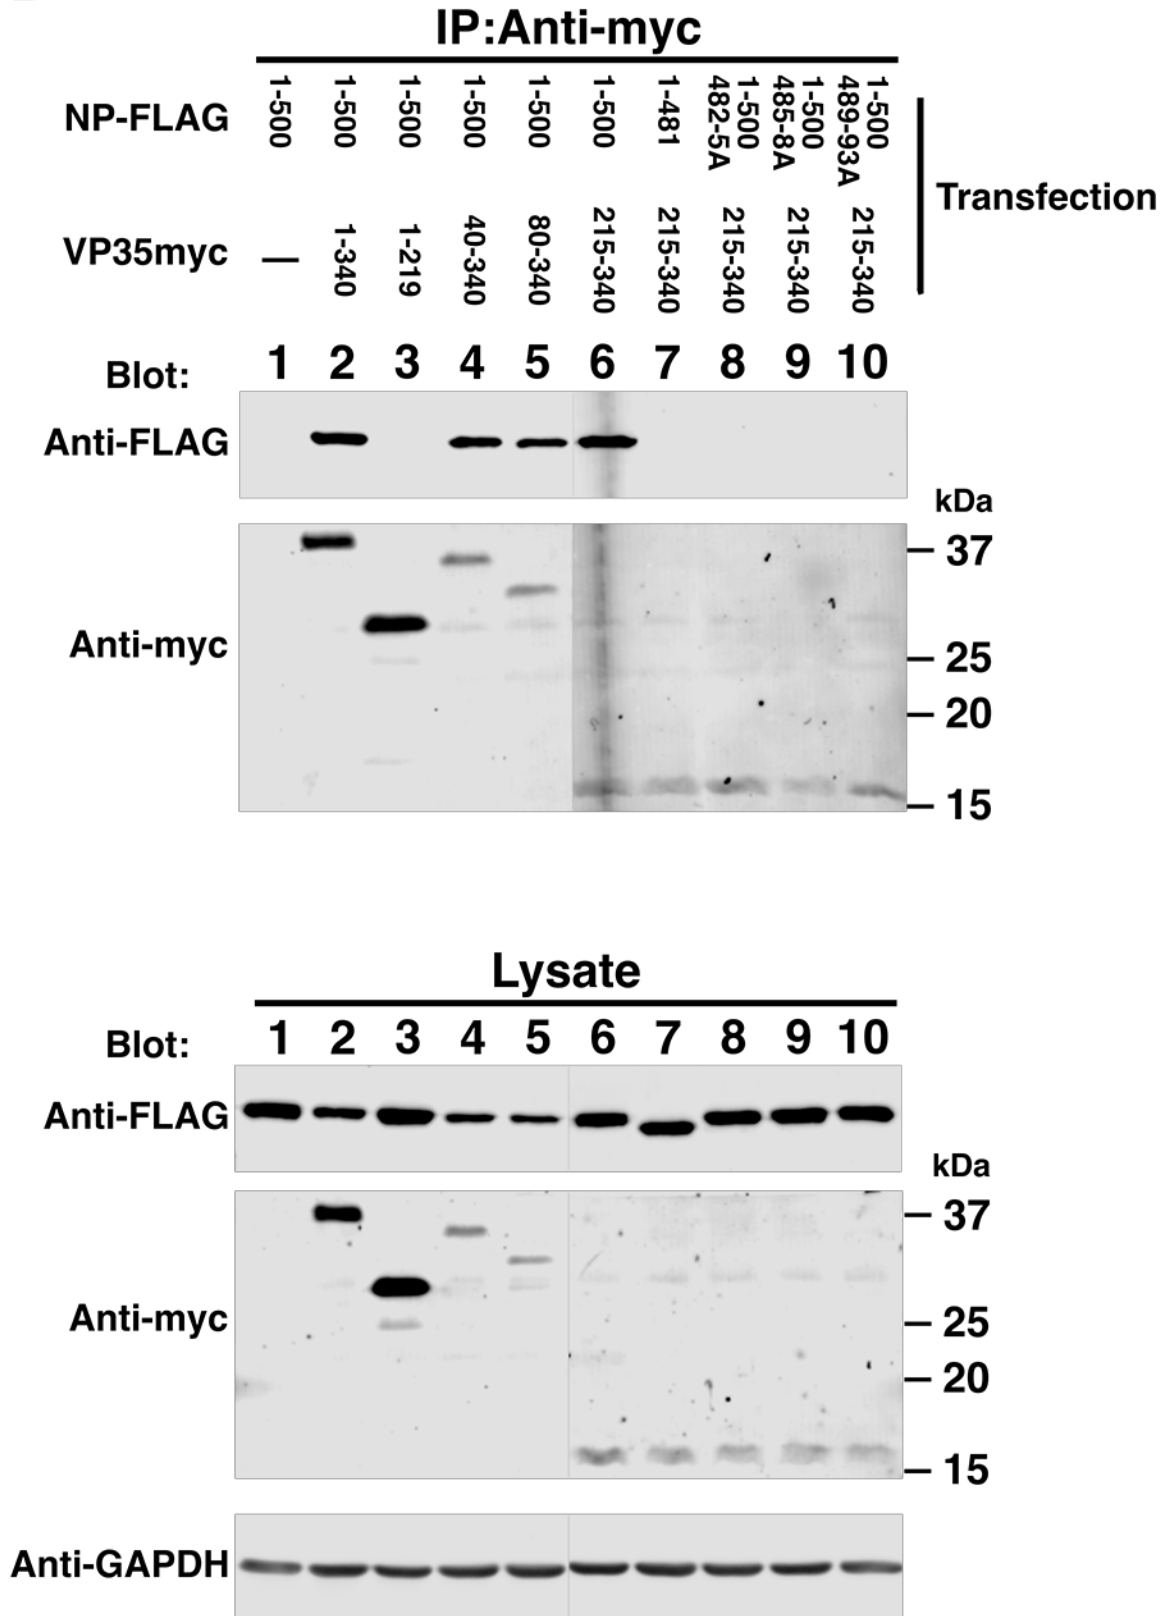

**C**

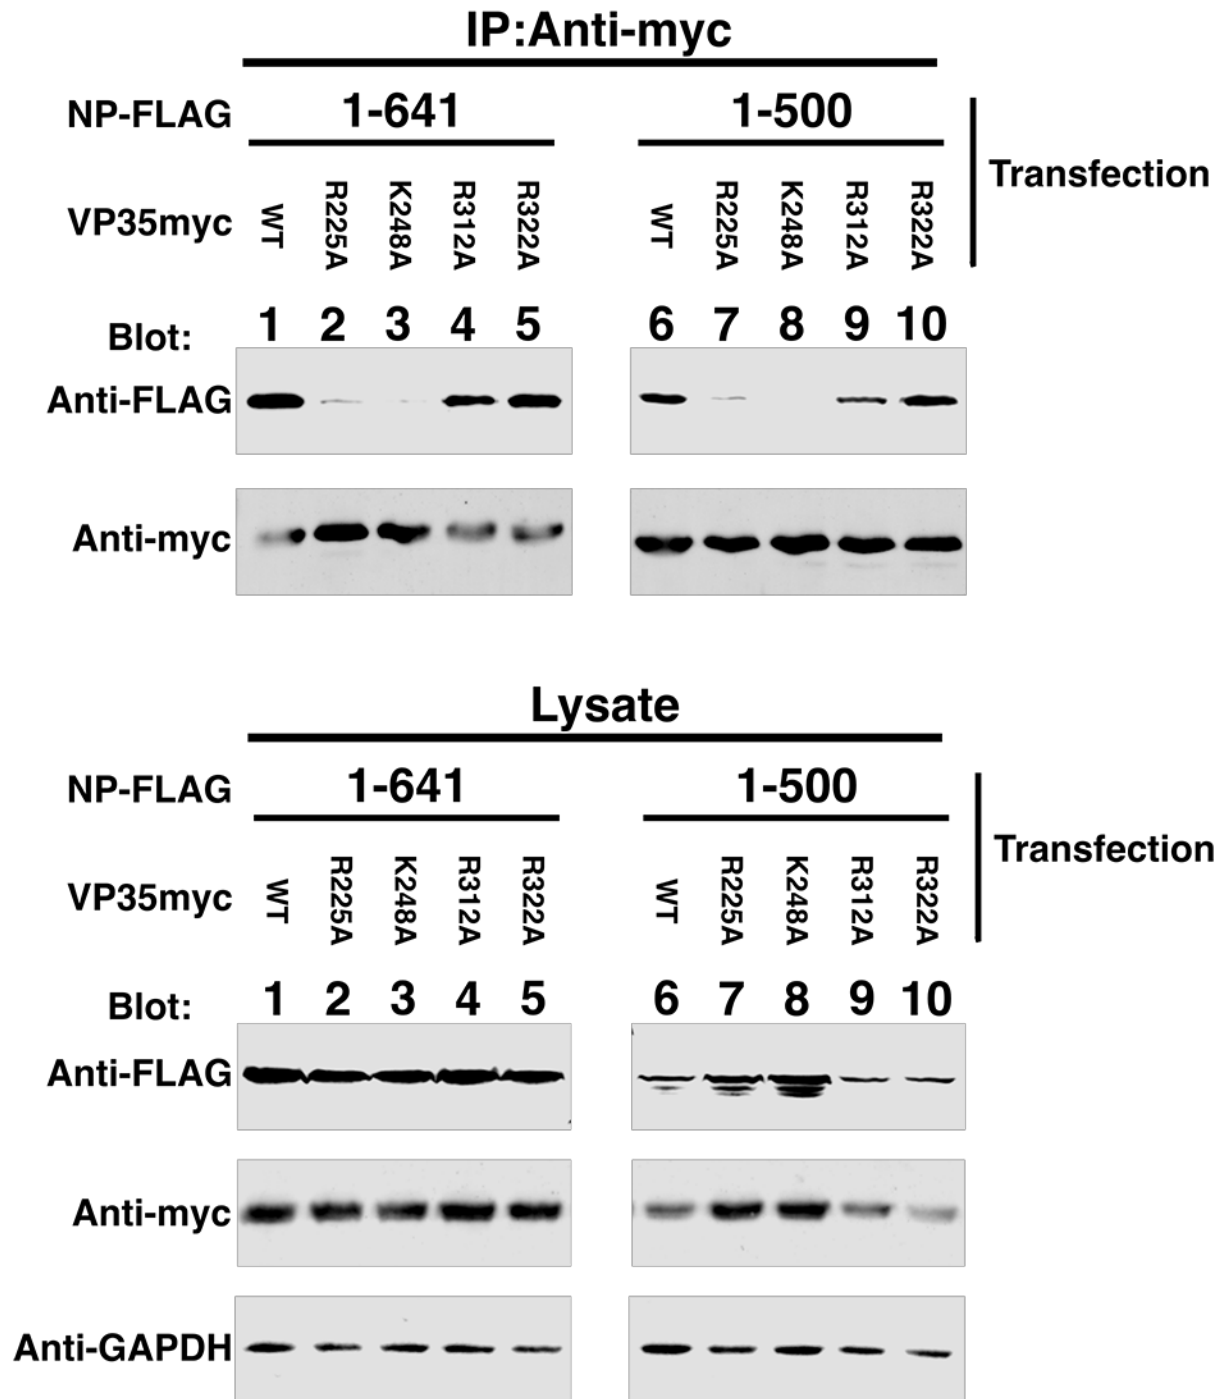

Miyake et al, Figure 6C

**D**

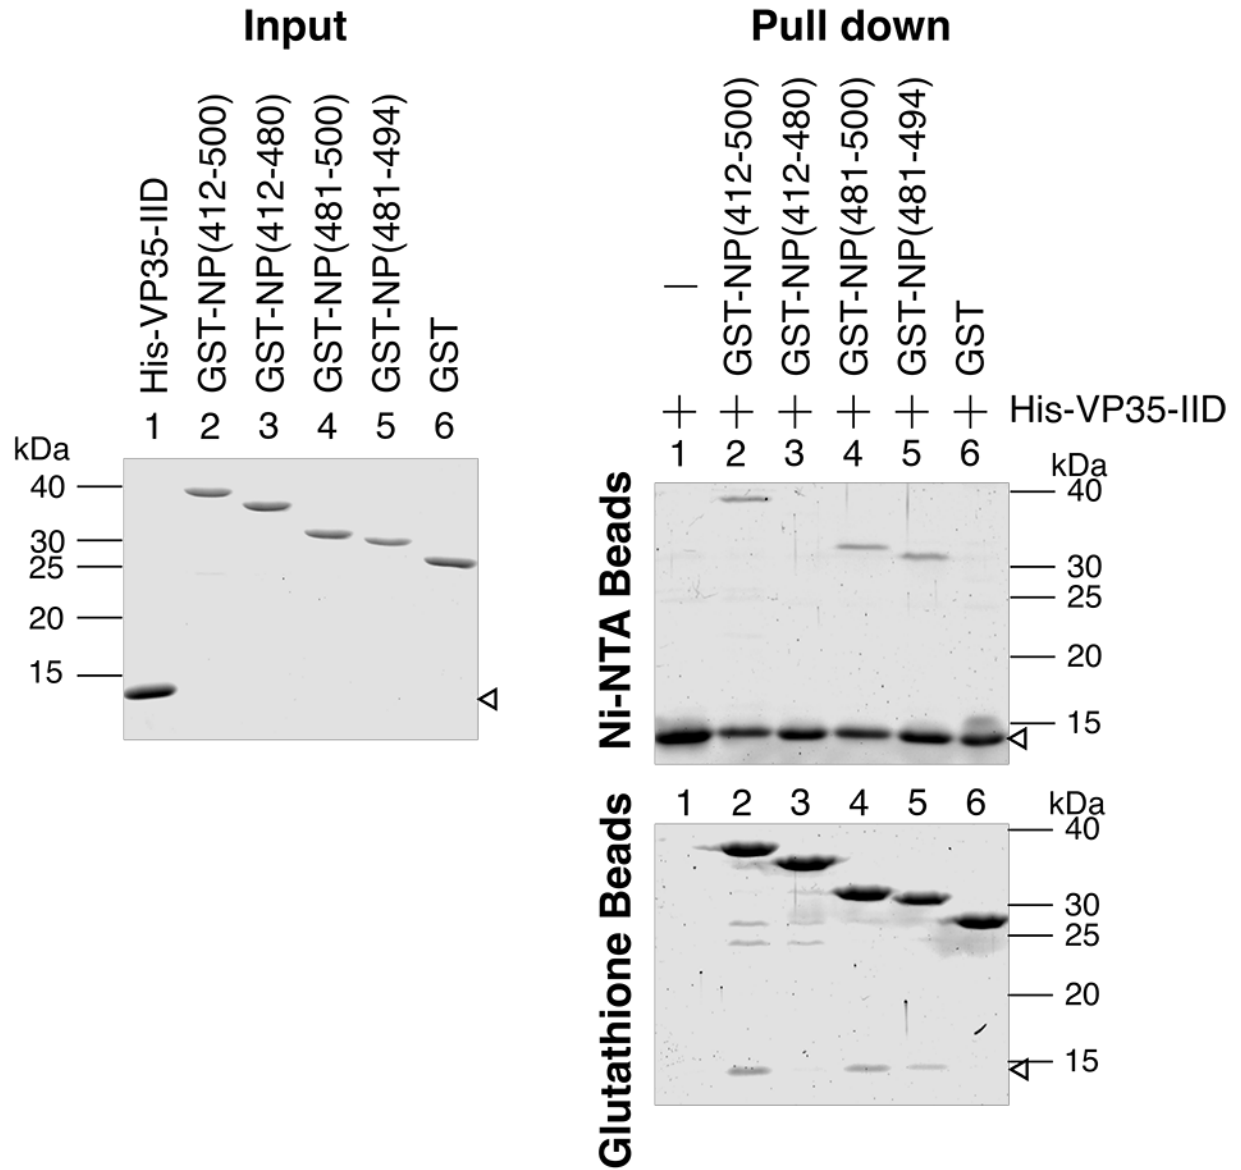

Miyake et al, Figure 6D



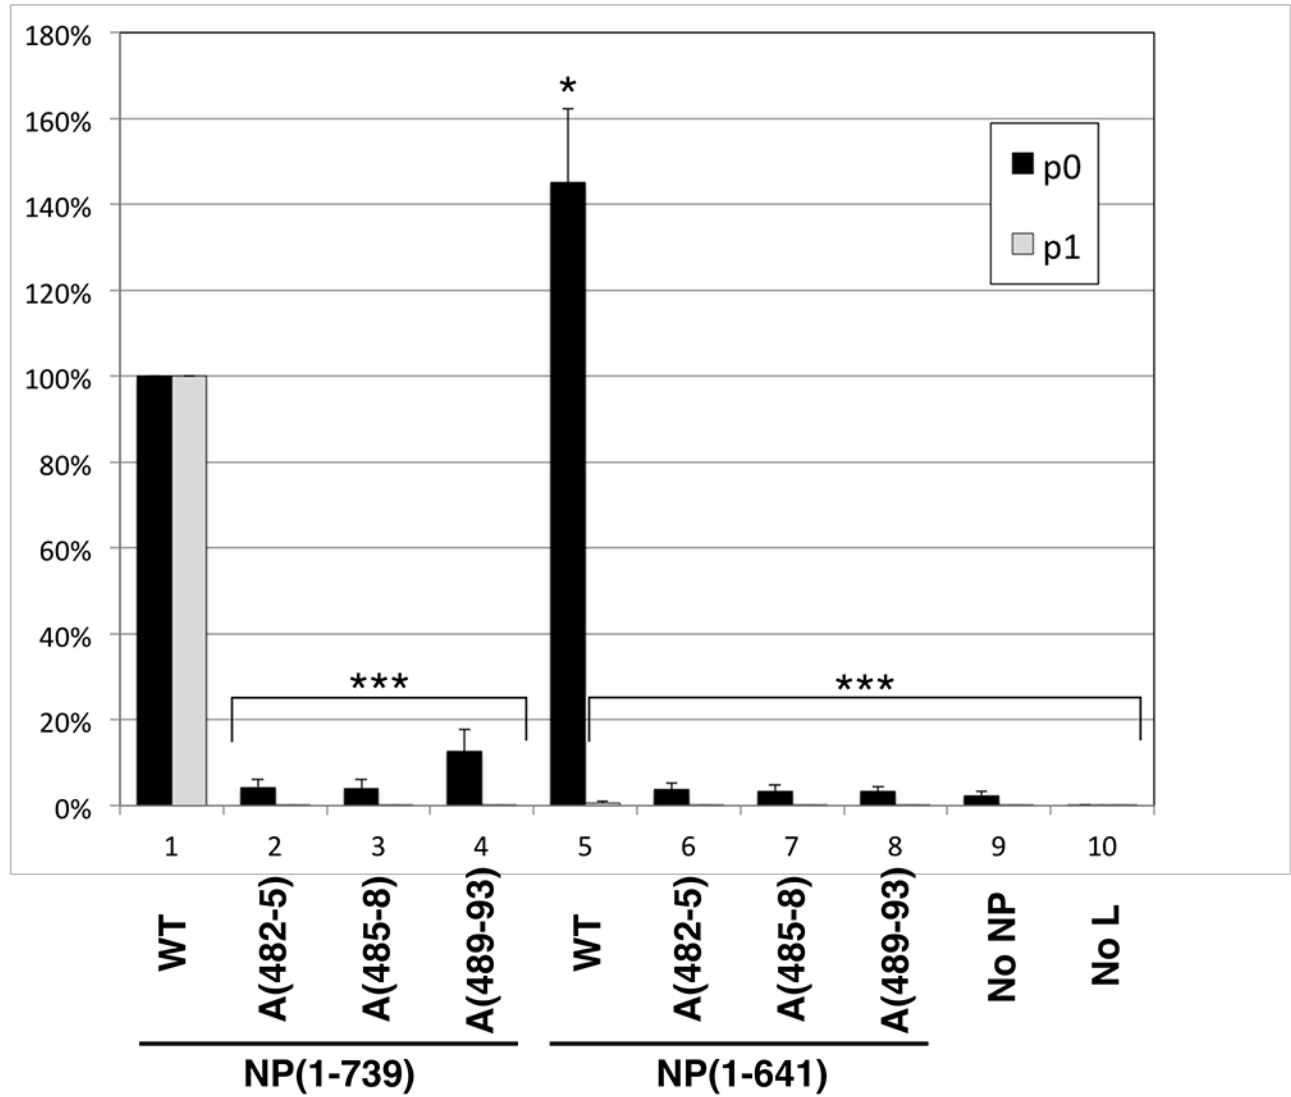

Miyake et al, Figure 7

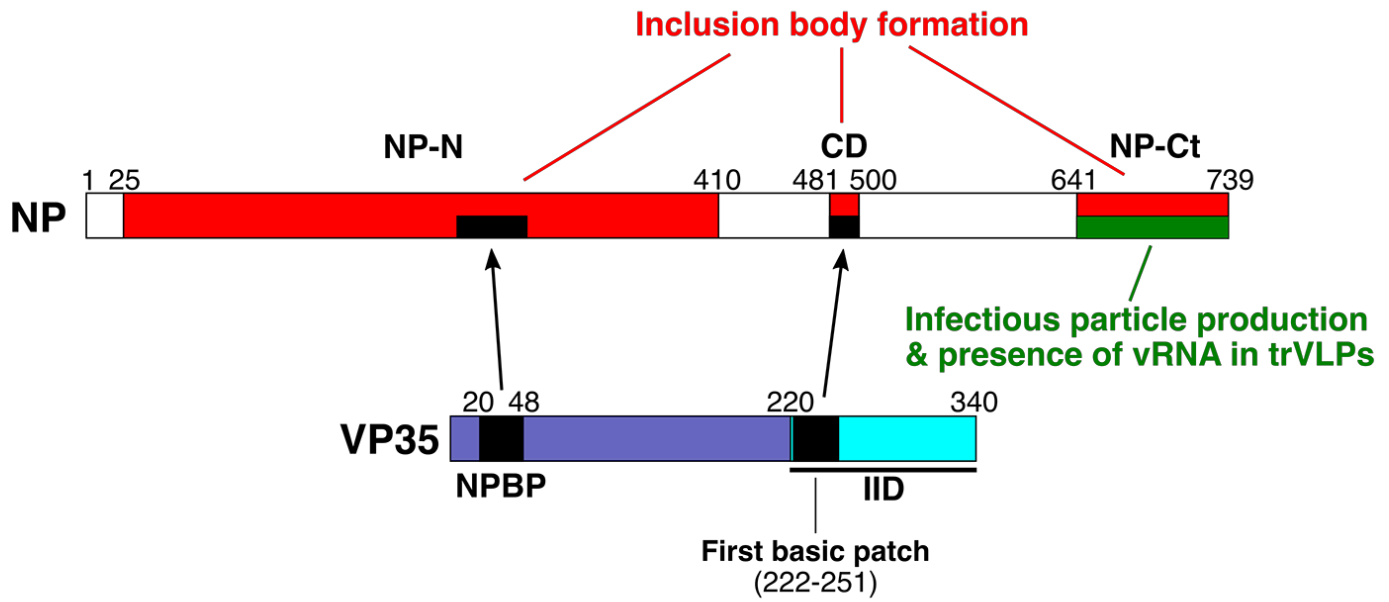

Miyake et al, Figure 8
